# Supplementary material for: Computational mechanistic elucidation of the rare earth metal-mediated cycloamidination of aminoalkenes with nitriles
Source: Royal Society of Chemistry journal article supplement (doi:10.1039/c8dt02537a), 2018-01-01
Supplement: c8dt02537a1.pdf [file c8dt02537a1.pdf]

# Electronic Supplementary Material (ESI) for Dalton Transaction  
# This journal is © The Royal Society of Chemistry 2018

## SUPPLEMENTARY INFORMATION

### Computational mechanistic elucidation of the rare earth metal-mediated cycloamidation of aminoalkenes with nitriles

SvenTobisch<sup>a</sup>

<sup>a</sup>School of Chemistry, University of St Andrews, Purdie Building, North Haugh, St Andrews, KY16 9ST, United Kingdom, E-mail: st40@st-andrews.ac.uk

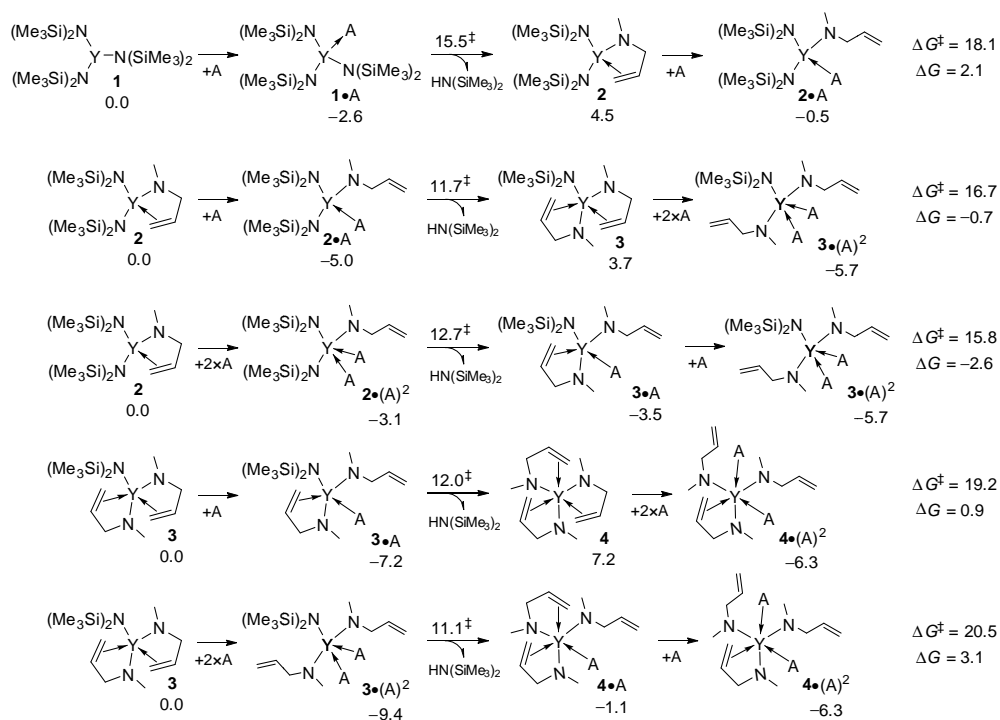

**Fig. S1.** Sequential Y-N(SiMe<sub>3</sub>)<sub>2</sub>σ-bond aminolysis at [Y{N(SiMe<sub>3</sub>)<sub>2</sub>}<sub>3</sub>] starting material **1** by A. Free energies are given in kcal mol<sup>-1</sup> relative to (reactant ± nxA/HN(TMS)<sub>2</sub>).

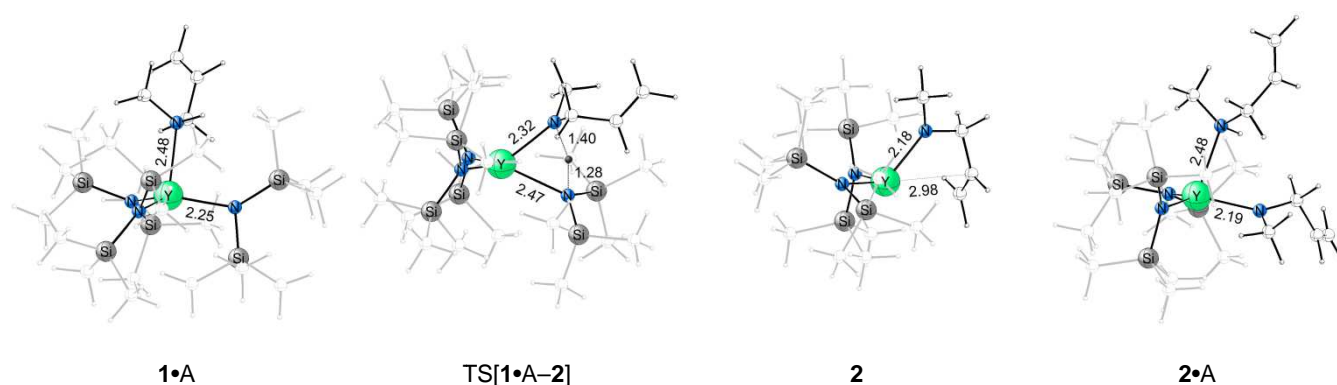

**Fig. S2.** Selected structural parameter (angstroms) of the optimized structures of key stationary points for Y-N(SiMe<sub>3</sub>)<sub>2</sub>σ-bond aminolysis at [Y{N(SiMe<sub>3</sub>)<sub>2</sub>}<sub>3</sub>] starting material **1** by A.

The silylamide ligands are greyed out to enhance the visualisation of crucial structural aspects.

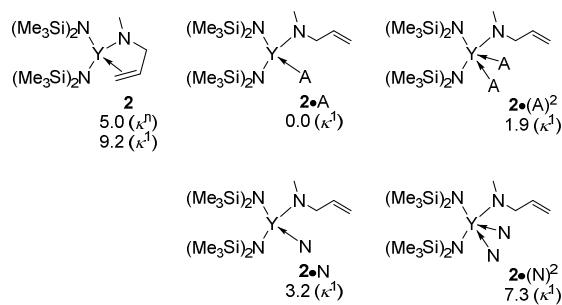

**Fig. S3.** Reagent association at  $[\text{Y}\{\text{N}(\text{SiMe}_3)_2\}_2(\text{NRR}^1)]$  compound **2**. Free energies are given in  $\text{kcal mol}^{-1}$  relative to  $(2\bullet\text{A}\pm n\text{xA/N})$ .

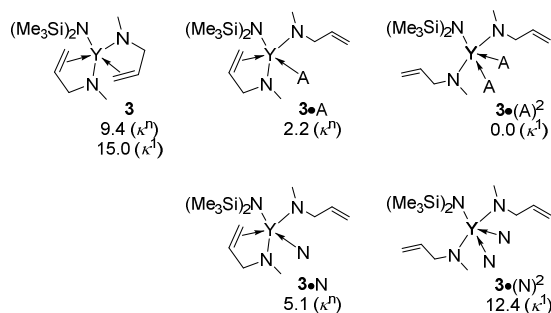

**Fig. S4.** Reagent association at  $[\text{Y}\{\text{N}(\text{SiMe}_3)_2\}(\text{NRR}^1)_2]$  compound **3**. Free energies are given in  $\text{kcal mol}^{-1}$  relative to  $(3\bullet\text{A}\pm n\text{xA/N})$ .

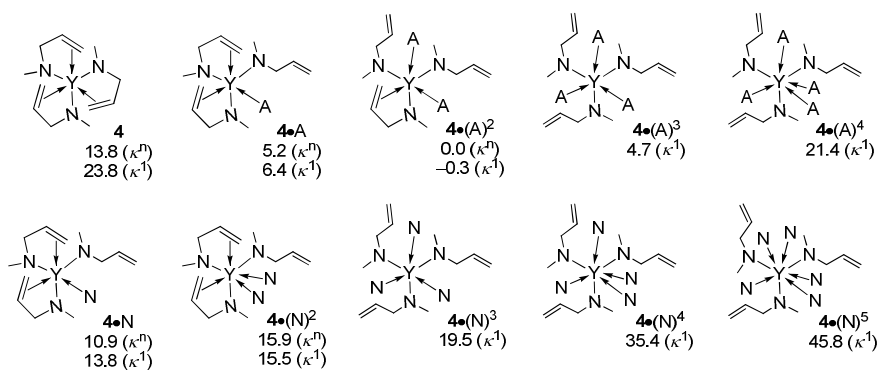

**Fig. S5.** Reagent association at  $[\text{Y}(\text{NRR}^1)_3]$  compound **4**. Free energies are given in  $\text{kcal mol}^{-1}$  relative to  $(4\bullet\text{A})^2\pm n\text{xA/N}$ .

S3

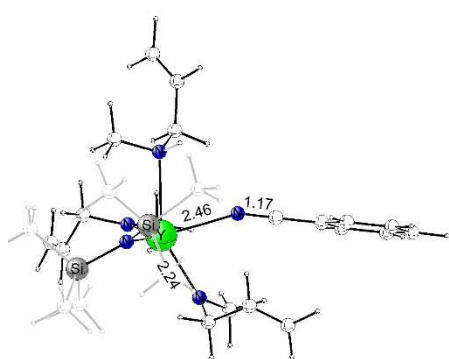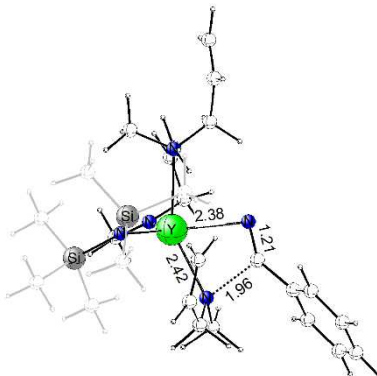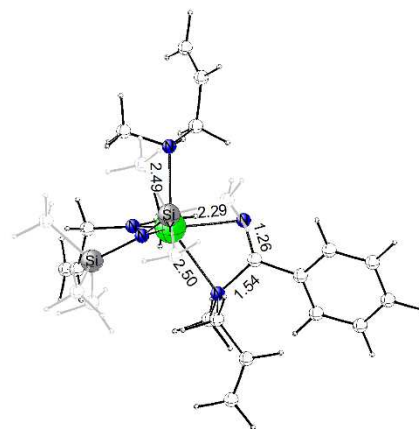

3•N•A

TS[3•N•A-5•A]

5•A

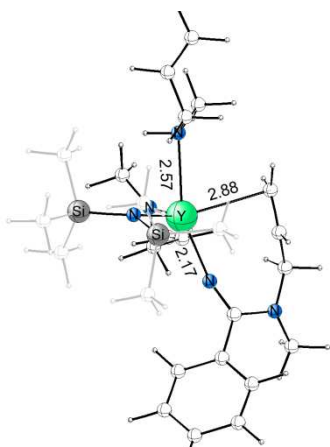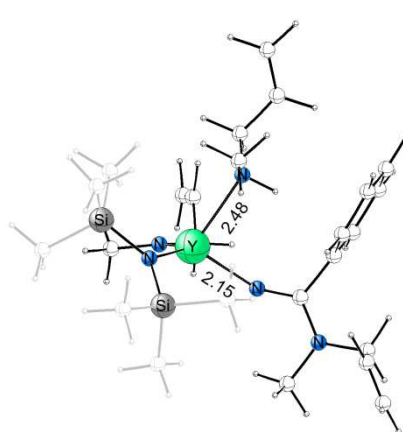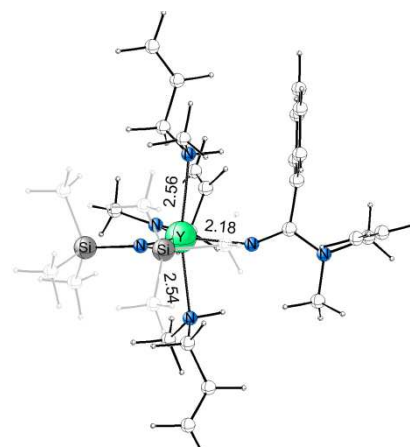

5'•A

5''•A

5''•(A)<sup>2</sup>

**Fig. S6.** Selected structural parameter (angstroms) of the optimised structures of key stationary points for nitrile insertion into the Y–NRR' $\sigma$ -bond at nitrile adduct **3•N•A** of the  $[Y\{N(SiMe_3)_2\}(NRR')_2]$  compound.

The silylamide ligand is greyed out to enhance the visualisation of crucial structural aspects.

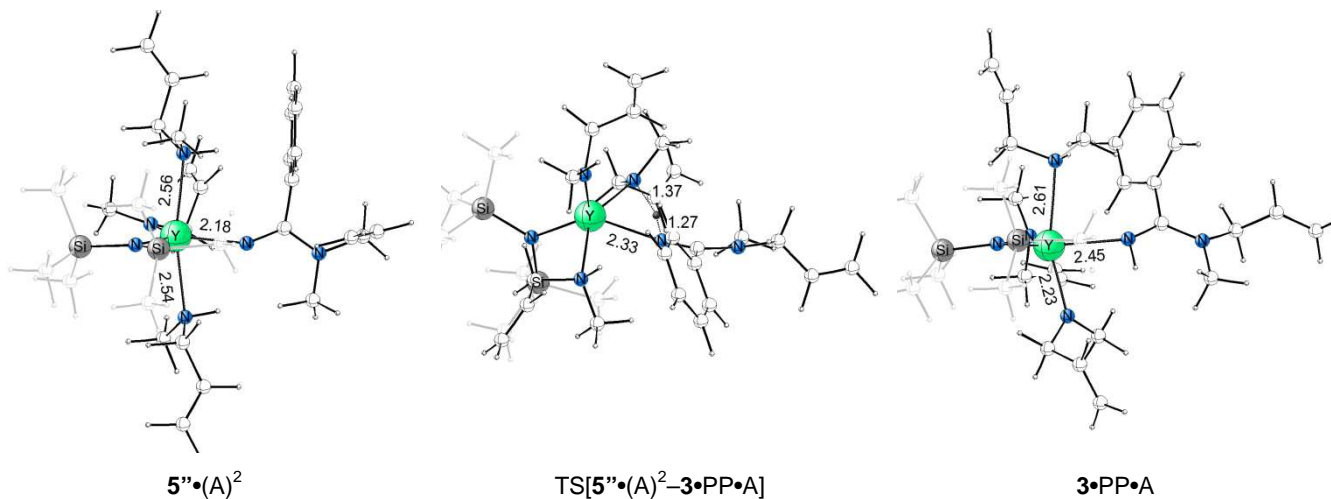

**Fig. S7.** Selected structural parameter (angstroms) of the optimised structures of key stationary points for Y–N $\sigma$ -bond aminolysis at amine adduct  $5''\bullet(A)^2$  of the yttrium amidinate.

The silylamide ligand is greyed out to enhance the visualisation of crucial structural aspects.

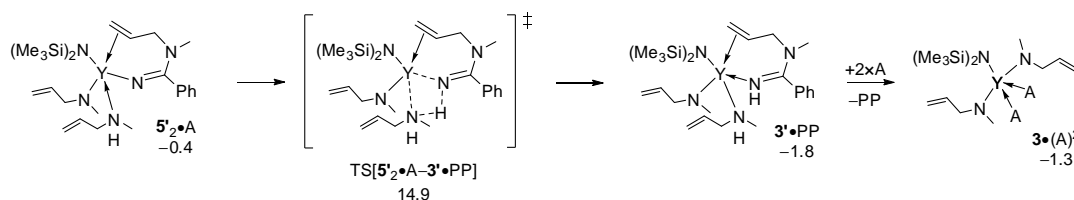

**Fig.S8.** Y–N bond aminolysis at amine adduct  $5''_2\bullet A$  of the yttrium amidinate to involve species featuring a chelate Y–amidinate functionality. Free energies are given in kcal mol<sup>-1</sup> relative to  $(3\bullet(A)^2)_{\pm n \times A/N}$ .

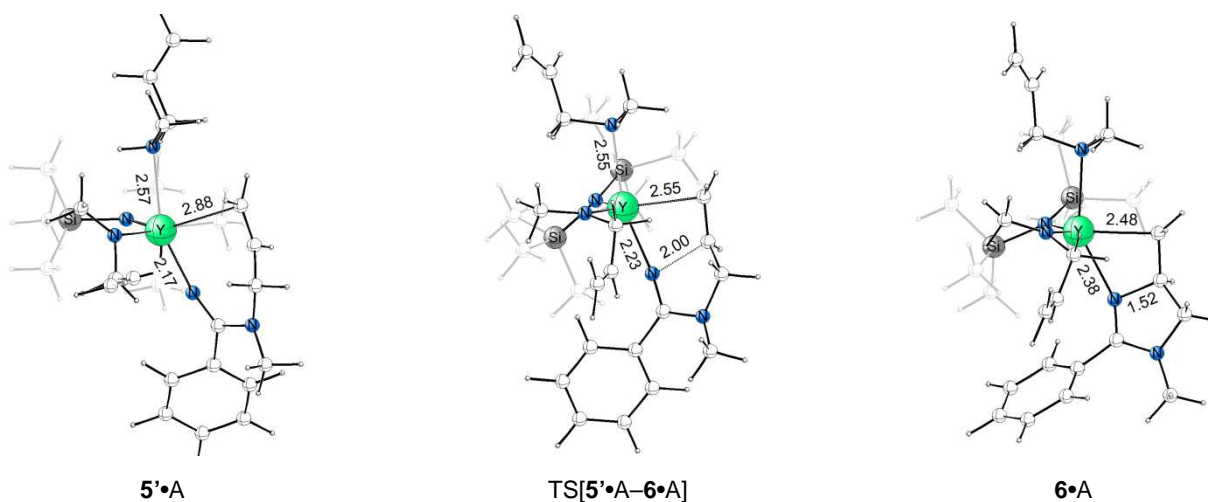

**Fig. S9.** Selected structural parameter (angstroms) of the optimised structures of key stationary points for migratory olefin insertion into the Y–N  $\sigma$ -bond at amine adduct  $5'\bullet A$  of the yttrium amidinate.

The silylamide ligand is greyed out to enhance the visualisation of crucial structural aspects.

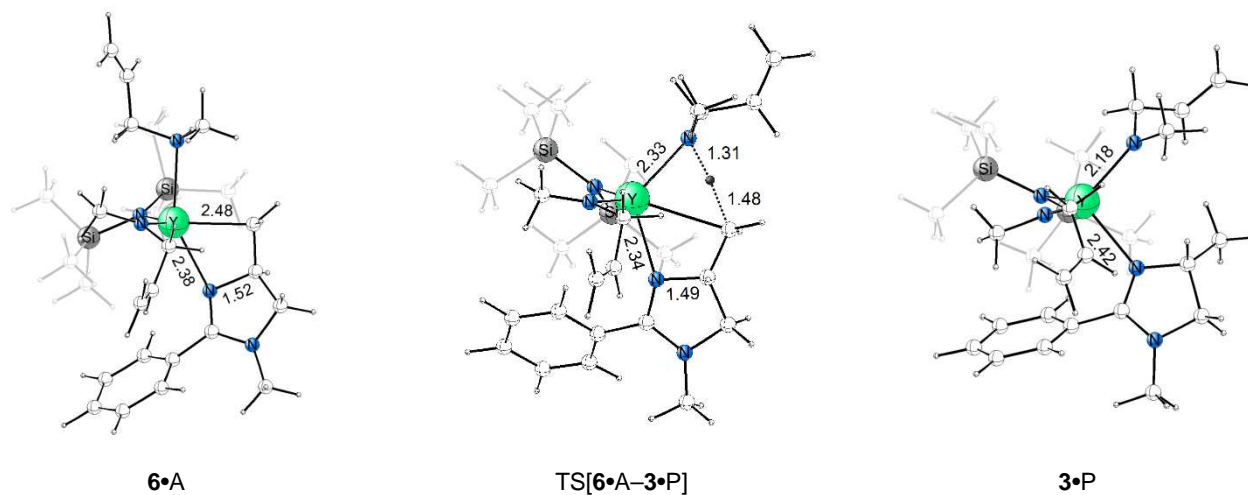

**Fig. S10.** Selected structural parameter (angstroms) of the optimized structures of key stationary points for Y-C  $\sigma$ -bond azacycle tether aminolysis at amine adduct **6•A** of the yttrium 4-imidazolylmethyl intermediate.

The silylamide ligand is greyed out to enhance the visualisation of crucial structural aspects.

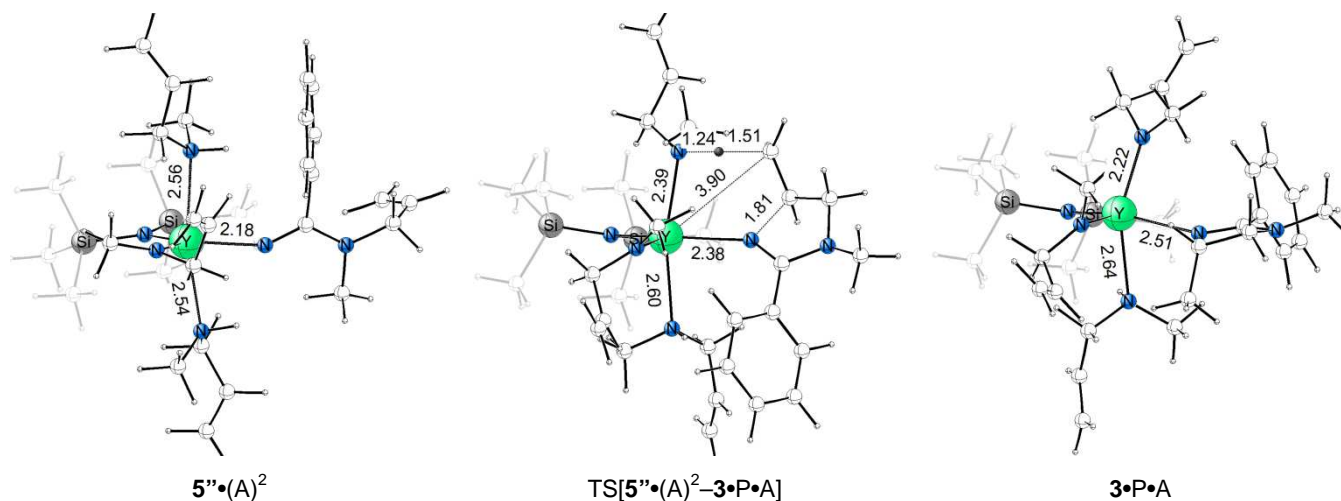

**Fig. S11.** Selected structural parameter (angstroms) of the optimized structures of key stationary points for non-insertive N-C ring closure with concurrent delivery of the amino proton to the olefin unit at amine adduct **5''•(A)<sup>2</sup>** of the yttrium amidinate.

The silylamide ligand is greyed out to enhance the visualisation of crucial structural aspects.

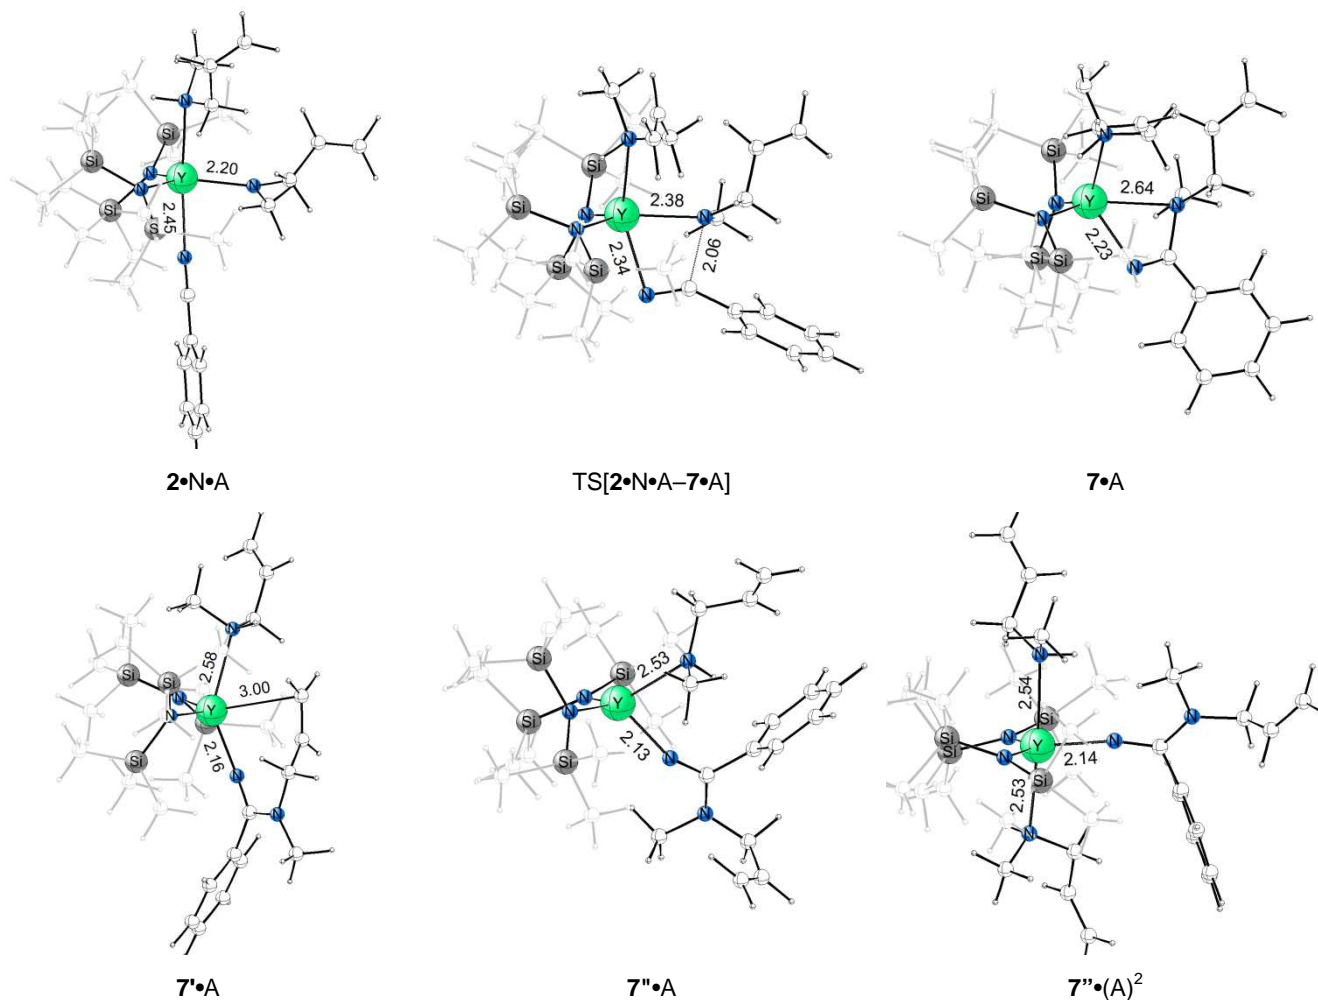

**Fig. S12.** Selected structural parameter (angstroms) of the optimised structures of key stationary points for nitrile insertion into the Y–NRR'  $\sigma$ -bond at nitrile adduct **2•N•A** of the  $[Y\{(SiMe_3)_2\}_2(NRR')]$  compound.

The silylamide ligands are greyed out to enhance the visualisation of crucial structural aspects.

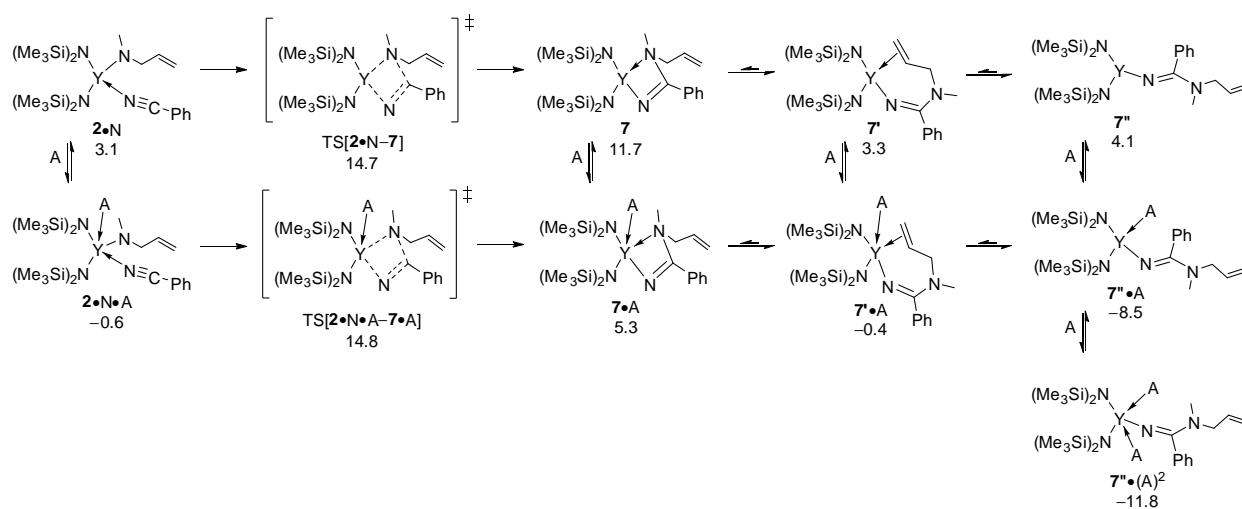

**Fig.S13.** Nitrile insertion into the Y–NRR'  $\sigma$ -bond at **2**. Free energies are given in kcal mol<sup>-1</sup> relative to (**2•A**±  $nxA/N$ ).

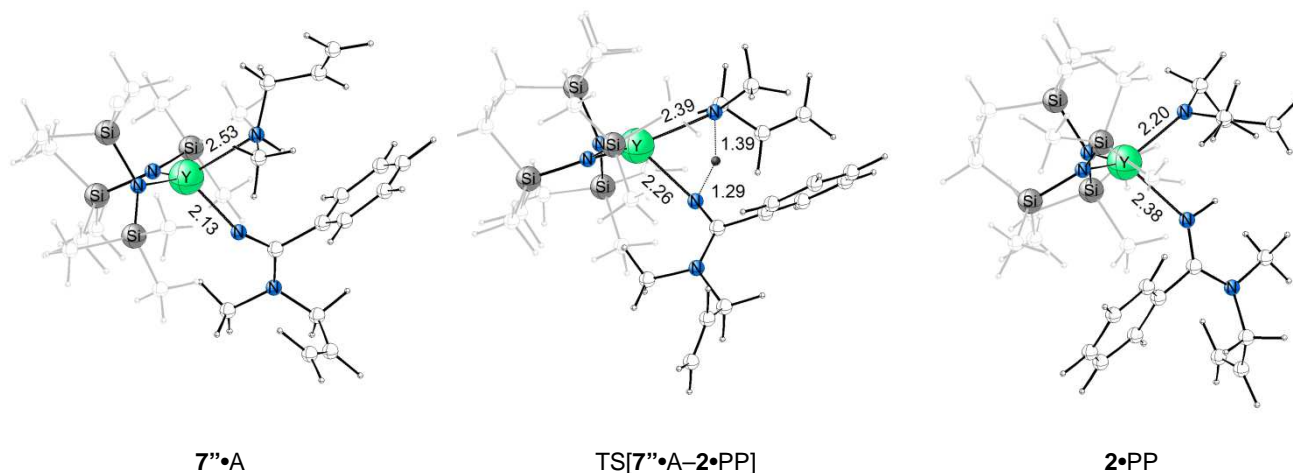

**Fig. S14.** Selected structural parameter (angstroms) of the optimised structures of key stationary points for Y–N bond aminolysis at amine adduct  $7''\bullet A$  of the yttrium amidinate.

The silylamide ligands are greyed out to enhance the visualisation of crucial structural aspects.

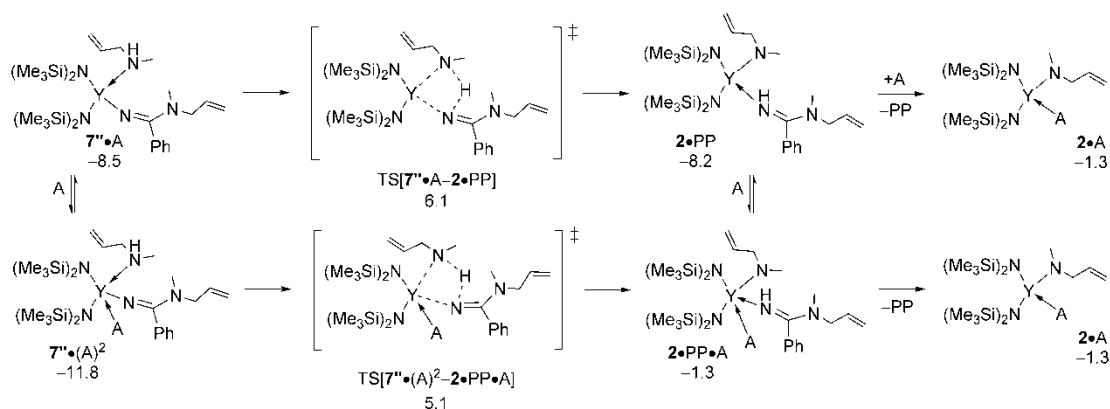

**Fig.S15.** Y–N bond aminolysis at amine adducts  $7\bullet(A)^n$  of the yttrium amidinate to involve species featuring a chelate Y–amidinate functionality.

Free energies are given in  $\text{kcal mol}^{-1}$  relative to  $(2\bullet A \pm n \times A/N)$ .

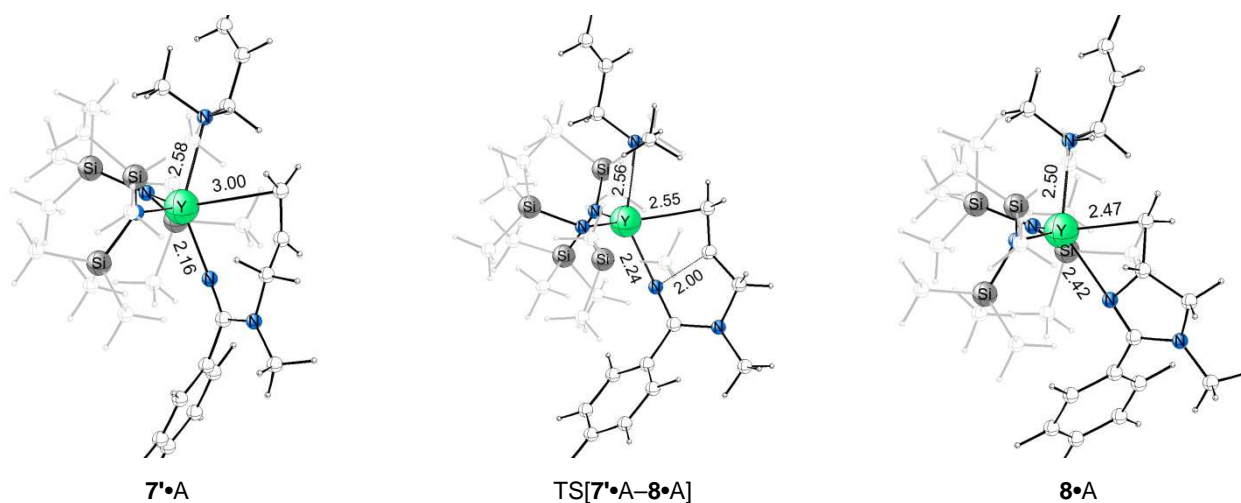

**Fig. S16.** Selected structural parameter (angstroms) of the optimised structures of key stationary points for migratory olefin insertion into the Y–N  $\sigma$ -bond at amine adduct  $7\bullet A$  of the yttrium amidinate.

The silylamide ligands are greyed out to enhance the visualisation of crucial structural aspects.

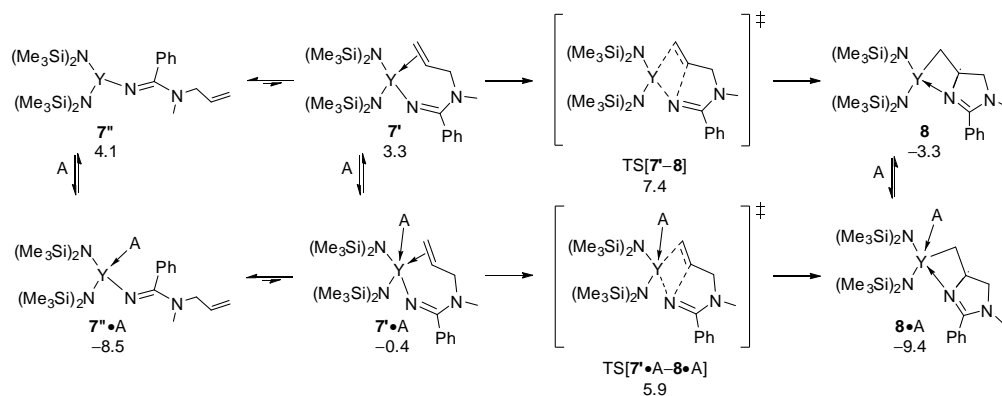

**Fig. S17.** Migratory C=C bond 1,2 insertion into the Y–N  $\sigma$ -bond at yttrium amidinate **7**. Free energies are given in kcal mol<sup>-1</sup> relative to (**2•A**  $\pm$   $n \times A/N$ ).

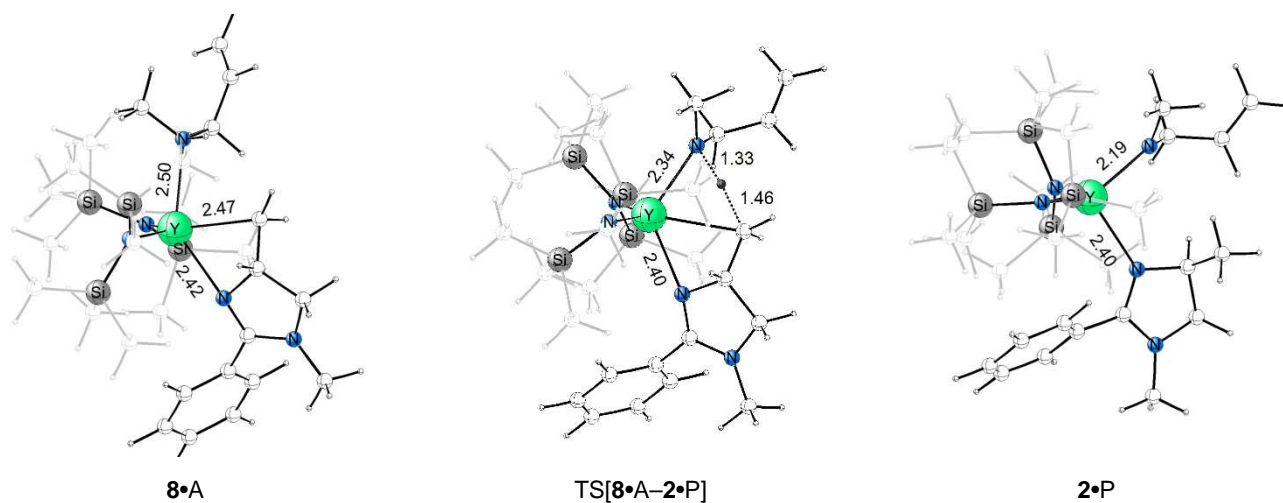

**Fig. S18.** Selected structural parameter (angstroms) of the optimised structures of key stationary points for Y–C  $\sigma$ -bond azacycle tether aminolysis at amine adduct **8•A** of the yttrium alkyl intermediate.

The silylamide ligands are greyed out to enhance the visualisation of crucial structural aspects.

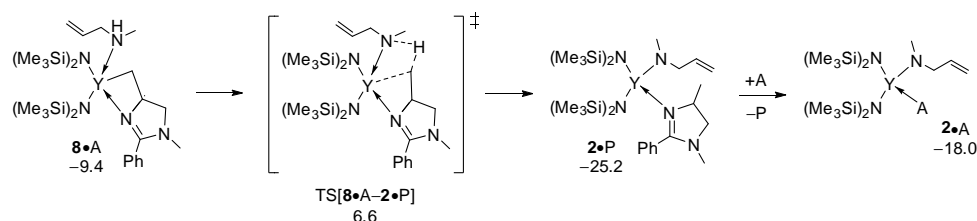

**Fig. S19.** Y–C  $\sigma$ -bond aminolysis at amine adduct **8•A** of the yttrium 4-imidazolylmethyl intermediate. Free energies are given in kcal mol<sup>-1</sup> relative to (**2•A**  $\pm$   $n \times A/N$ ).



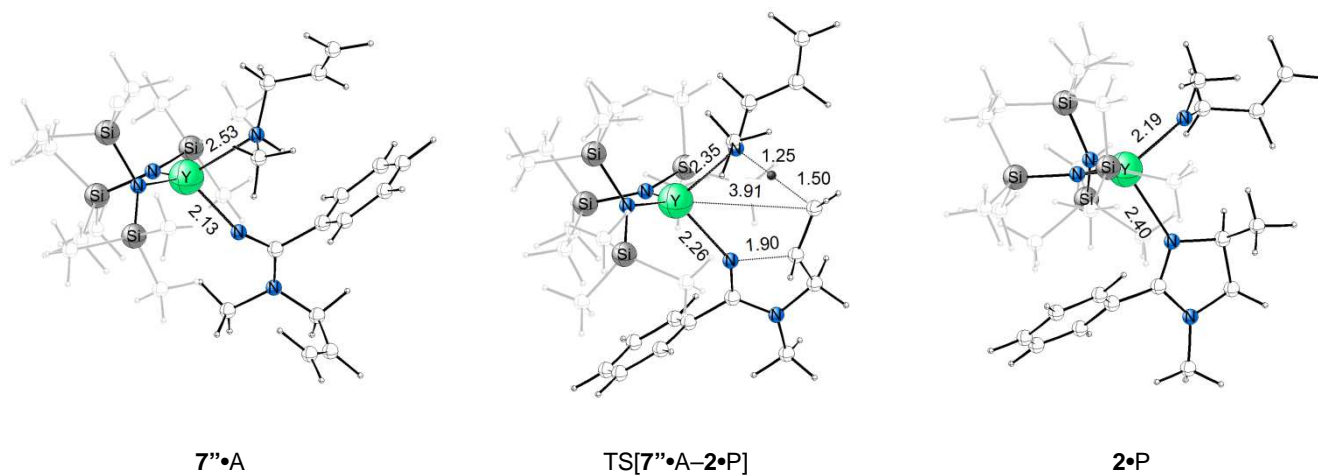

**Fig. S20.** Selected structural parameter (angstroms) of the optimised structures of key stationary points for non-insertive N–C ring closure with concurrent delivery of the amino proton to the olefin unit at amine adduct  $7''\bullet A$  of the yttrium amidinate.

The silylamide ligands are greyed out to enhance the visualisation of crucial structural aspects.

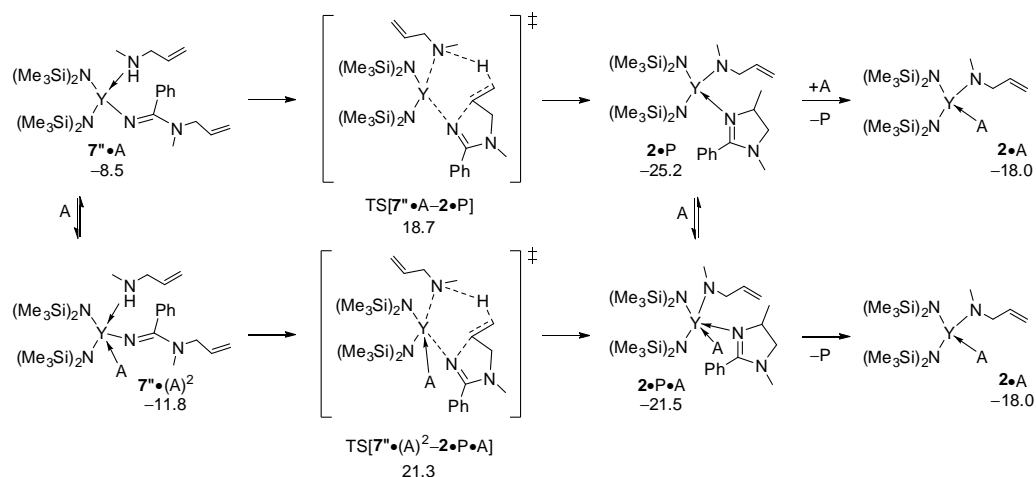

**Fig.S21.** N–C ring closure triggered by concomitant amino proton delivery onto the adjacent C=C linkage at amine adducts  $7\bullet(A)^n$  of the yttrium amidinate. Free energies are given in  $\text{kcal mol}^{-1}$  relative to  $(2\bullet A \pm n \times A/N)$ .

## Sensitivity of the predicted kinetic gap between crucial steps of the $\sigma$ -insertive pathway upon the employed DFT method

**Table 1.** DFT assessed kinetic gap between preferable pathways for migratory C=C bond 1,2-insertion and Y–C  $\sigma$ -bond aminolysis traversed along the  $\sigma$ -insertive route

|                           | PW6B96-D3 | PWPB96-D3 | M06-2X | TPSSh-D3 | PBE0-D3 |
|---------------------------|-----------|-----------|--------|----------|---------|
| $\Delta\Delta G^\ddagger$ | 0.7       | 2.7       | 0.9    | 1.0      | 1.2     |

A positive value for the free-energy gap (given in kcal mol<sup>-1</sup>) indicates that aminolysis is more demanding kinetically, hence slower than migratory 1,2-insertion.

**Table 2.** DFT assessed energetics ( $\Delta G$ ,  $\Delta G^\ddagger$  in kcal mol<sup>-1</sup>) for individual steps obtained at PW6B95-D3(SP)//BP86-D3(opt) and PW6B95-D3(SP)//PW6B95-D3(opt) levels.

|                                           |            |                    |                   |          |
|-------------------------------------------|------------|--------------------|-------------------|----------|
| nitrile insertion <b>3•N</b> → <b>5</b>   | <b>3•N</b> | TS[ <b>3•N–5</b> ] | <b>5</b>          |          |
| PW6B95-D3(SP)//BP86-D3(opt)               | 0.0        | 12.1               | 8.2               |          |
| PW6B95-D3(SP)//PW6B95-D3(opt)             | 0.0        | 12.3               | 8.1               |          |
| olefin 1,2 insertion <b>5'</b> → <b>6</b> | <b>5''</b> | <b>5'</b>          | TS[ <b>5'–6</b> ] | <b>6</b> |
| PW6B95-D3(SP)//BP86-D3(opt)               | 0.0        | -1.0               | 1.7               | -5.6     |
| PW6B95-D3(SP)//PW6B95-D3(opt)             | 0.0        | -1.1               | 1.9               | -5.4     |

## Cartesian coordinates (in Å) of located key structures

| 1•A                   |           |           | TS[1•A-2]                    |    |           | 2                     |           |    |           |           |           |
|-----------------------|-----------|-----------|------------------------------|----|-----------|-----------------------|-----------|----|-----------|-----------|-----------|
| E = -2874.602164 a.u. |           |           | E = -2874.568805a.u.         |    |           | E = -1999.567651a.u.  |           |    |           |           |           |
| N <sub>imag</sub> = 0 |           |           | N <sub>imag</sub> = 1 (995i) |    |           | N <sub>imag</sub> = 0 |           |    |           |           |           |
| Y                     | -0.015838 | 0.078655  | 0.072792                     | Y  | -0.170945 | 0.215873              | 0.072016  | Y  | 0.736837  | -0.213504 | 0.132279  |
| N                     | -0.999624 | -0.437001 | 1.997429                     | N  | 2.043680  | -0.824285             | -0.298628 | N  | -0.272448 | 0.045241  | -1.815478 |
| N                     | -1.236957 | -0.115188 | -1.798331                    | N  | -1.245674 | 0.428256              | -1.850010 | N  | -0.700007 | -0.295872 | 1.799918  |
| N                     | 2.194995  | -0.307921 | 0.191403                     | N  | -1.493738 | 0.042278              | 1.840079  | N  | 2.074615  | 1.464076  | 0.511510  |
| N                     | 0.261611  | 2.502311  | -0.354038                    | N  | 1.605843  | 1.613539              | 0.574134  | C  | 3.267861  | 1.475172  | -0.329372 |
| Si                    | 2.322815  | -2.000328 | 0.556485                     | H  | 2.077933  | 0.364640              | 0.161587  | C  | 3.607326  | 0.037024  | -0.636979 |
| Si                    | -2.087479 | -1.775547 | 2.215309                     | Si | -1.567443 | -0.784622             | -3.048839 | Si | -0.483024 | 1.529079  | -2.675795 |
| Si                    | -0.599829 | 0.568334  | 3.347242                     | Si | -1.908275 | 2.020359              | -1.995968 | Si | -0.615173 | -1.532944 | -2.390752 |
| Si                    | -2.854491 | 0.510452  | -1.814214                    | Si | 2.995898  | -0.6*80987            | -1.784225 | Si | -2.200244 | 0.556311  | 1.960684  |
| Si                    | -0.602373 | -0.893869 | -3.215227                    | Si | 2.413631  | -2.1281*18            | 0.820827  | Si | 0.103484  | -1.154583 | 3.051624  |
| C                     | 3.436248  | 2.476039  | 0.312903                     | C  | -1.061458 | 2.792105              | 3.009847  | C  | 1.992846  | 2.590361  | 1.419028  |
| C                     | 4.890355  | 0.142888  | 1.463647                     | C  | -3.449189 | 1.169372              | 3.837611  | C  | 0.067903  | -2.737755 | -1.055046 |
| C                     | 4.514863  | 0.404645  | -1.575844                    | C  | -0.642655 | 0.291052              | 4.692964  | C  | 0.258951  | -1.957724 | -4.007475 |
| C                     | 0.755449  | -2.862129 | -0.090433                    | C  | -1.585012 | -2.479986             | 0.383593  | C  | -2.440585 | -1.948902 | -2.571264 |
| C                     | 3.721721  | -2.900512 | -0.336968                    | C  | -2.680354 | -2.427153             | 3.163904  | C  | -3.194562 | 0.415073  | 0.672776  |
| C                     | 2.430596  | -2.335454 | 2.405845                     | C  | -4.178359 | -0.934451             | 0.911155  | C  | -1.870035 | 2.378878  | 2.324731  |
| C                     | 0.966145  | 1.564554  | 2.953560                     | C  | -1.722091 | 2.841922              | -0.300295 | C  | -3.274272 | -0.121654 | 3.361258  |
| C                     | -1.956141 | 1.829875  | 3.729330                     | C  | -0.990424 | 3.087376              | -3.251819 | C  | 1.778726  | -1.743139 | 2.313521  |
| C                     | -0.231368 | -0.369431 | 4.943801                     | C  | -3.747920 | 2.049157              | -2.407980 | C  | -0.783274 | -2.720213 | 3.610175  |
| C                     | -3.439331 | 0.935293  | -0.060346                    | C  | 2.099944  | 0.399992              | -3.054926 | C  | 0.530346  | -0.095316 | 4.549389  |
| C                     | -3.027766 | 2.103077  | -2.833063                    | C  | 4.640323  | 0.158421              | -1.399484 | C  | -0.627734 | 2.944961  | -1.441316 |
| C                     | -4.125201 | -0.693316 | -2.524358                    | C  | 3.383718  | -2.356739             | -2.552644 | C  | -2.036838 | 1.504849  | -3.749436 |
| C                     | 1.290405  | -0.842312 | -3.201954                    | C  | 1.557385  | -1.765071             | 2.463936  | C  | 0.996027  | 1.883976  | -3.796685 |
| C                     | -1.184654 | -2.686756 | -3.339435                    | C  | 1.835904  | -3.796547             | 0.152555  | H  | 0.244467  | 2.959415  | -0.770002 |
| C                     | -1.093510 | -0.050698 | -4.837363                    | C  | 4.251918  | -2.310692             | 1.206704  | H  | -1.531661 | 2.844928  | -0.823768 |
| C                     | -2.721611 | -2.449533 | 0.551639                     | C  | -0.267048 | -2.166528             | -2.957900 | H  | -0.677701 | 3.918208  | -1.951908 |
| C                     | -1.248843 | -3.225787 | 3.090466                     | C  | -3.272280 | -1.564802             | -2.820968 | H  | 1.185866  | 1.047228  | -4.847223 |
| C                     | -3.609726 | -1.314274 | 3.238079                     | C  | -1.503155 | -0.098922             | -4.808163 | H  | 1.909300  | 2.047853  | -3.206954 |
| H                     | 3.327672  | -1.879943 | 2.846728                     | H  | -4.760707 | -0.323927             | 1.615240  | H  | 0.831613  | 2.786600  | -4.406761 |
| H                     | 1.550777  | -1.906122 | 2.905320                     | H  | -4.056162 | -0.356700             | -0.016007 | H  | -2.914406 | -1.311482 | -3.330601 |
| H                     | 2.452162  | -3.413017 | 2.626993                     | H  | -4.766404 | -1.833892             | 0.675280  | H  | -2.974765 | -1.788649 | -1.625095 |
| H                     | 4.787664  | -0.641106 | -1.772070                    | H  | -0.927831 | -0.750257             | 4.898503  | H  | -2.581499 | -2.997175 | -2.875525 |
| H                     | 3.852270  | 0.726536  | -2.392797                    | H  | 0.433133  | 0.298347              | 4.465023  | H  | -2.930694 | 1.296813  | -3.143589 |
| H                     | 5.433194  | 1.009337  | -1.627770                    | H  | -0.791544 | 0.871644              | 5.616078  | H  | -1.977321 | 0.737643  | -4.536079 |
| H                     | 4.467478  | 0.358944  | 2.456138                     | H  | -4.069071 | 1.617512              | 3.047119  | H  | -2.184767 | 2.475498  | -4.246536 |
| H                     | 5.176709  | -0.917419 | 1.449182                     | H  | -3.902226 | 0.207726              | 4.114841  | H  | -0.433899 | -2.643399 | -0.074267 |
| H                     | 5.812366  | 0.734535  | 1.357489                     | H  | -3.507967 | 1.827423              | 4.718230  | H  | 1.165468  | -2.697133 | -0.916299 |
| H                     | -2.302604 | -1.952664 | -0.335276                    | H  | 0.332869  | -2.145130             | -2.037362 | H  | -0.130455 | -3.768076 | -1.384067 |
| H                     | -2.498070 | -3.522255 | 0.459394                     | H  | -0.733231 | -3.160219             | -3.023220 | H  | 1.345535  | -1.812960 | -3.927373 |
| H                     | -3.814047 | -2.337234 | 0.491224                     | H  | 0.439003  | -2.073946             | -3.794899 | H  | -0.101560 | -1.309286 | -4.819984 |
| H                     | -3.348092 | -1.034635 | 4.268689                     | H  | -2.288201 | 0.647602              | -4.995688 | H  | 0.073515  | -2.999451 | -4.309533 |
| H                     | -4.153597 | -0.471153 | 2.788534                     | H  | -0.531261 | 0.370714              | -5.016293 | H  | 2.451157  | -0.916396 | 2.016694  |
| H                     | -4.299425 | -2.170429 | 3.294663                     | H  | -1.645344 | -0.915139             | -5.533174 | H  | 1.687503  | -2.467908 | 1.483438  |
| H                     | -1.104313 | -0.933146 | 5.301432                     | H  | -3.951899 | 1.624145              | -3.401130 | H  | 2.320536  | -2.286212 | 3.101368  |
| H                     | 0.597318  | -1.079741 | 4.813613                     | H  | -4.324380 | 1.472279              | -1.670516 | H  | -1.023369 | -3.360369 | 2.748583  |
| H                     | 0.053086  | 0.338005  | 5.737688                     | H  | -4.130484 | 3.081118              | -2.405054 | H  | -1.726517 | -2.480580 | 4.119790  |
| H                     | -0.371907 | -3.576035 | 5.228872                     | H  | -3.379535 | -2.036772             | -1.835281 | H  | -0.163631 | -3.304458 | 4.307296  |
| H                     | -0.910399 | -2.961659 | 4.100988                     | H  | -4.068883 | -0.813652             | -2.914640 | H  | -0.382197 | 0.287832  | 5.028933  |
| H                     | -1.949228 | -0.470816 | 3.179669                     | H  | -3.447788 | -2.337734             | -3.585168 | H  | 1.134301  | 0.771638  | 4.244316  |
| H                     | 1.771795  | 0.930714  | 2.556504                     | H  | -2.341627 | 2.340981              | 0.456980  | H  | 1.094674  | -0.658043 | 5.308035  |
| H                     | 0.790411  | 2.388635  | 2.247016                     | H  | -0.690169 | 2.900243              | 0.087671  | H  | -1.284460 | 2.847159  | 1.520342  |
| H                     | 1.331242  | 2.034397  | 3.879129                     | H  | -2.060029 | 3.886837              | -0.362424 | H  | -1.299166 | 2.488931  | 3.258916  |
| H                     | -2.241516 | 2.397406  | 2.830826                     | H  | 0.086501  | 3.119352              | -3.031671 | H  | -2.805561 | 2.948499  | 2.432076  |
| H                     | -2.866281 | 1.339101  | 4.100039                     | H  | -1.106017 | 2.699280              | -4.272761 | H  | -2.774808 | -0.056270 | 4.339102  |
| H                     | -1.626266 | 2.550367  | 4.493465                     | H  | -1.367064 | 4.121527              | -3.239338 | H  | -3.541378 | -1.173852 | 3.186679  |
| H                     | 1.641418  | 1.040090  | -3.552975                    | H  | 2.112535  | -0.999727             | 3.024776  | H  | -4.210606 | 0.452539  | 3.432184  |
| H                     | 1.754707  | -1.012272 | -2.220414                    | H  | 0.512886  | -1.420656             | 2.397125  | H  | -3.578797 | -0.608739 | 0.247664  |
| H                     | 1.693517  | -1.594984 | -3.896377                    | H  | 1.550942  | -2.675615             | 3.081689  | H  | -2.577639 | 0.638115  | -0.514219 |
| H                     | -1.002847 | -3.247024 | -2.412366                    | H  | 0.887677  | -3.733149             | -0.396110 | H  | -4.056606 | 1.098597  | 0.370532  |
| H                     | -2.265778 | -2.724188 | -3.534207                    | H  | 2.581728  | -4.221286             | -0.532645 | C  | 3.213906  | -0.619637 | -1.742864 |
| H                     | -0.676934 | -3.214094 | -4.161367                    | H  | 1.700244  | -4.511680             | 0.978098  | H  | 2.877276  | 2.659097  | 2.085128  |
| H                     | -2.177360 | -0.070021 | -5.017856                    | H  | 4.838067  | -2.576598             | 0.315566  | H  | 1.101489  | 2.494521  | 2.055135  |
| H                     | -0.763222 | 0.998122  | -4.863310                    | H  | 4.684384  | -1.395444             | 1.633545  | H  | 1.916277  | 3.562303  | 0.888021  |
| H                     | -0.610547 | -0.569659 | -5.679869                    | H  | 4.390226  | -3.116855             | 1.943215  | H  | 4.122782  | 1.930408  | 0.210053  |
| H                     | -2.447602 | 2.944388  | -2.428120                    | H  | 4.488871  | 1.137526              | -0.922771 | H  | 3.142155  | 2.059109  | -1.266063 |
| H                     | -2.712304 | 1.953492  | -3.874137                    | H  | 5.265639  | -0.445188             | -0.727886 | H  | 4.138155  | -0.505620 | 0.152595  |
| H                     | -4.083216 | 2.416932  | -2.847583                    | H  | 5.207278  | 0.324465              | -2.328449 | H  | 2.689646  | -0.104750 | -2.550325 |
| H                     | -3.962676 | -0.874719 | -3.596523                    | H  | 4.041485  | -2.962401             | -1.914242 | H  | 3.435141  | -1.678466 | -1.898877 |
| H                     | -4.088085 | -1.662659 | -2.008983                    | H  | 2.480858  | -2.941827             | -2.767474 |    |           |           |           |
| H                     | -5.141814 | -0.286924 | -2.409335                    | H  | 3.913374  | -2.191923             | -3.503680 |    |           |           |           |
| H                     | -3.848524 | 0.046998  | 0.436594                     | H  | 2.188420  | -0.051858             | -4.056351 |    |           |           |           |
| H                     | -2.674263 | 1.335709  | 0.619740                     | H  | 1.027357  | 0.512324              | -2.844705 |    |           |           |           |
| H                     | -4.244087 | 1.683995  | -0.118550                    | H  | 2.547307  | 1.396482              | -3.103757 |    |           |           |           |
| H                     | 3.626394  | -2.787316 | -1.426374                    | H  | -1.697136 | -2.742570             | 3.542225  |    |           |           |           |
| H                     | 4.717030  | -2.538994 | -0.045846                    | H  | -3.200998 | -1.905462             | 3.978014  |    |           |           |           |
| H                     | 3.679105  | -3.975697 | -0.104972                    | H  | -3.257607 | -3.334153             | 2.927883  |    |           |           |           |
| H                     | 2.998877  | 2.965058  | -0.568314                    | H  | -0.144224 | 2.857405              | 2.412390  |    |           |           |           |
| H                     | 2.863334  | 2.744219  | 1.213003                     | H  | -1.826031 | 3.399560              | 2.507857  |    |           |           |           |
| H                     | 4.436049  | 2.919580  | 0.437579                     | H  | -0.855833 | 3.253548              | 3.987689  |    |           |           |           |
| H                     | -0.224925 | -2.504551 | 0.260954                     | H  | -1.351306 | -2.045542             | -0.601650 |    |           |           |           |
| H                     | 0.736945  | -2.887795 | -1.187635                    | H  | -0.662667 | -2.888985             | 0.817617  |    |           |           |           |
| H                     | 0.788078  | -3.906664 | 0.255075                     | H  | -2.227214 | -3.340613             | 0.143987  |    |           |           |           |
| Si                    | 3.662881  | 0.602196  | 0.097614                     | Si | -1.650937 | 1.015922              | 3.292550  |    |           |           |           |
| C                     | 0.586327  | 2.622512  | -1.809721                    | C  | 2.165119  | 1.830895              | 1.917410  |    |           |           |           |
| H                     | -0.267632 | 2.228982  | -2.373596                    | H  | 1.913627  | 2.843193              | 2.283701  |    |           |           |           |
| H                     | 1.431511  | 1.939368  | -1.994871                    | H  | 1.687596  | 1.120320              | 2.612362  |    |           |           |           |
| C                     | 0.934492  | 4.012075  | -2.252356                    | C  | 3.657385  | 1.646471              | 1.946442  |    |           |           |           |
| C                     | 0.266808  | 4.671509  | -3.201631                    | C  | 4.539086  | 2.619892              | 2.184538  |    |           |           |           |
| H                     | 1.115856  | 2.746022  | 0.161228                     | Si | -2.487883 | -1.355788             | 1.622426  |    |           |           |           |
| C                     | -0.813224 | 3.420293  | 0.080214                     | C  | 1.961804  | 2.690253              | -0.346201 |    |           |           |           |
| H                     | 1.792883  | 4.486081  | -1.763388                    | H  | 4.015602  | 0.642138              | 1.701714  |    |           |           |           |
| H                     | -0.593275 | 4.222573  | -3.703443                    | H  | 4.209999  | 3.635680              | 2.417848  |    |           |           |           |
| H                     | 0.559478  | 5.672828  | -3.518725                    | H  | 5.614814  | 2.441148              | 2.162979  |    |           |           |           |
| H                     |           |           |                              |    |           |                       |           |    |           |           |           |

## 2•A

E = -2212.497880a.u.  
N<sub>imag</sub> = 0

Y 0.215507 -0.114053 0.106272  
N 2.320225 -0.608663 0.451981  
N 1.030439 2.208390 -0.236035  
N -0.941288 -0.529051 1.971552  
C 0.100153 3.225999 -0.772037  
N -0.703435 -0.050440 -1.942626  
Si -1.386399 -2.188155 1.896966  
Si -1.098594 0.508176 3.335395  
Si -2.397927 0.270669 -2.022028  
Si 0.277778 -0.501939 -3.292193  
C 4.217117 -1.418425 -0.951433  
C -1.505159 2.265260 2.760784  
C 0.524712 0.586543 4.300481  
C -2.476440 -0.009059 4.518375  
C -2.967403 1.021470 -0.379740  
C -3.410826 -1.300794 -2.297581  
C -2.875889 1.525567 -3.354300  
C 1.128105 -2.146851 -2.935920  
C 1.610066 0.817846 -3.583656  
C -0.636466 -0.690066 -4.935290  
C -0.624460 -2.872973 0.284432  
C -3.247189 -2.462381 1.788497  
C -0.691790 -3.231290 3.307380  
H 0.480267 -2.851116 0.261752  
H -1.001958 -2.402577 -0.641012  
H -0.897176 -3.934828 0.199376  
H -1.078824 -2.895927 4.280320  
H 0.405128 -3.164617 3.344184  
H -0.962110 -4.291757 3.190524  
H -2.310310 -1.012640 4.935477  
H -3.450109 -0.013885 4.007202  
H -2.545213 0.692445 5.363861  
H -3.679211 -1.888813 0.955830  
H -3.744633 -2.133770 2.712192  
H -3.492720 -3.523862 1.633895  
H -2.511408 2.313603 2.321927  
H -0.799365 2.620021 1.995146  
H -1.461302 2.978578 3.597401  
H 1.351037 0.927004 3.657581  
H 0.799184 -0.408451 4.680720  
H 0.462381 1.271903 5.159319  
H 0.379477 -2.949132 -2.855136  
H 1.699849 -2.121059 -1.996000  
H 1.836208 -2.419566 -3.732630  
H 2.309210 0.892988 -2.736044  
H 1.149232 1.805202 -3.738907  
H 2.220442 0.589556 -4.470407  
H -0.994519 0.272430 5.324976  
H -1.499234 -1.366370 -4.854939  
H 0.048943 -1.117191 -5.683436  
H -3.244803 -2.022889 -1.484500  
H -3.133856 -1.795539 -3.239640  
H -4.489453 -1.085512 -2.337072  
H -2.792805 1.108314 -4.366423  
H -2.237228 2.420557 -3.307930  
H -3.917553 1.852747 -3.213815  
H -2.553979 2.029448 -0.226669  
H -2.707082 0.415225 0.501554  
H -4.063348 1.123945 -0.390504  
C 4.593404 -1.424244 -2.232083  
H 3.048663 -2.319059 1.546068  
H 1.690528 -1.445050 2.283488  
H 3.323979 -0.745250 2.333770  
H 4.267878 0.205115 0.441411  
H 3.325808 0.506024 -1.029523  
H 4.387862 -2.306974 -0.335866  
H 4.427154 -0.557824 -2.877216  
H 5.070206 -2.291872 -2.689611  
C 3.539550 -0.262168 -0.263409  
C 1.889292 2.715759 0.875864  
H 1.226022 3.071147 1.676759  
H 2.440390 1.840437 1.255675  
C 2.833554 3.799908 0.452928  
C 2.808123 5.050091 0.919988  
H 3.583913 3.514114 -0.293256  
H 2.073785 5.361008 1.666758  
H 3.523604 5.802552 0.587267  
C 2.611768 -1.311372 1.695744  
H 1.660164 1.949635 -1.007918  
H -0.628951 3.490850 0.004237  
H -0.433635 2.785771 -1.622111  
H 0.622250 4.141655 -1.088576

## 3•N•A

E = -1875.457346a.u.  
N<sub>imag</sub> = 0

Y -0.586555 -0.165456 -0.358101  
N 1.772643 0.516426 -0.519393  
Si -0.971289 0.149929 3.110584  
N 0.593752 -2.065728 -0.449472  
C 2.928066 0.387983 -0.631931  
C 3.309309 -2.916089 1.396275  
C 2.117786 -2.312035 1.459367  
N -0.642693 2.395921 -0.122761  
N -1.645908 -0.354714 1.613863  
C 0.546690 1.262346 2.814420  
C -0.367846 -1.277930 4.190947  
C -2.179898 1.173634 4.146839  
C -3.091843 -2.256899 -0.082316  
C -4.594679 0.034935 1.297180  
C -3.553704 -2.332319 2.915644  
H -2.397240 -3.098291 0.054705  
H -2.774344 -1.727012 -0.997133  
H -4.089120 -2.670352 -0.296973  
H -4.466740 0.675093 0.411366  
H -4.658748 0.694591 2.175180  
H -5.558880 -0.485519 1.194199  
H -3.645291 -1.790965 3.868342  
H -2.775118 -3.099076 3.035665  
H -4.509266 -2.848242 2.735191  
H 0.404193 -1.872164 3.681425  
H -1.190836 -1.956979 4.452064  
H 0.065730 -0.900479 5.130113  
H -3.062545 0.581195 4.429681  
H -2.538014 2.053551 3.591661  
H -1.709848 1.530796 5.076033  
H 1.204209 0.910554 2.004335  
H 1.159685 1.296642 3.727769  
H 0.253783 2.301129 2.596023  
H 1.522655 -3.525701 -1.679248  
H 1.245774 -1.937362 -2.438525  
H 2.573938 -2.154307 -1.262946  
H 0.002868 -2.676964 1.464134  
H 0.964002 -3.890915 0.575923  
H 2.036066 -1.338616 1.955946  
H 3.423811 -3.884587 0.903800  
H 4.206258 -2.482304 1.804455  
C 1.516854 -2.431309 -1.492835  
C 0.861696 -2.804747 0.785734  
C 4.330920 0.236450 -0.728676  
C 4.947860 0.076798 -1.986896  
C 7.102109 -0.058219 -0.890603  
C 5.110332 0.258240 0.447353  
C 6.489596 0.107716 0.356025  
H 7.092009 0.117374 1.264446  
H 4.621530 0.380475 1.412724  
C 6.328286 -0.070137 -2.057044  
H 4.335723 0.056600 -2.887525  
H 8.183647 -0.177977 -0.954078  
H 6.805742 -0.199755 -3.028305  
N -1.610093 0.169565 -2.271260  
C -2.982906 0.464362 -2.642142  
C -0.715395 0.170435 -3.413834  
C -3.598360 -0.583681 -3.535468  
C -3.976677 -0.800096 -4.800013  
H -0.730810 1.138782 -3.965702  
H 0.330046 0.019020 -3.083251  
H -0.931995 -0.620856 -4.157492  
H -3.585967 0.540624 -1.718608  
H -3.063739 1.451214 -3.155824  
H -3.672842 -1.585864 -3.100287  
H -3.892827 0.607595 -5.261582  
H -4.385160 -1.180930 -5.418246  
Si -3.155627 -1.179234 1.473141  
C -2.021646 2.784037 0.232452  
C -0.169343 3.057538 -1.365372  
H -0.844820 2.741474 -2.172704  
H 0.826386 2.644588 -1.589587  
C -0.101785 4.554356 -1.273427  
C -0.839670 5.389082 -2.008863  
H 0.601016 4.961760 -0.536754  
H -1.549746 5.011605 -2.748507  
H -0.758132 6.471953 -1.908585  
H -0.016771 2.655504 0.646062  
H -2.689813 2.459206 -0.576706  
H -2.313108 2.255931 1.147216  
H -2.142553 3.871047 0.364627

## TS[3•N•A-5•A]

E = -1875.445023a.u.  
N<sub>imag</sub> = 1 (1171)

Y -0.258845 0.209162 -0.380633  
N 2.088889 0.461507 -0.046297  
Si -1.611111 0.622980 2.845083  
N 0.800751 -1.881666 0.205489  
C 2.364575 -0.709926 0.106270  
C 0.548143 -0.707637 2.951570  
C 0.282479 -1.983725 2.665611  
N -0.199467 2.685318 0.093368  
N -1.820956 0.098970 1.223865  
C 0.134409 1.364063 3.098198  
C -1.775616 -0.758110 4.125155  
C -2.837959 1.979287 3.329898  
C -2.707298 -2.100885 -0.506048  
C -4.262002 0.567757 -0.415435  
C -4.397700 -1.405821 1.896823  
H -2.300711 -2.904753 0.125393  
H -1.942762 -1.865188 -1.264419  
H -3.567632 -2.510782 -1.056865  
H -3.651850 1.026579 -1.206904  
H -4.636361 1.377931 0.229026  
H -5.131016 0.089258 -0.891750  
H -4.755977 -0.657275 2.618079  
H -3.907445 -2.212718 2.458735  
H -5.281327 -1.832255 1.397545  
H -1.109658 -1.601857 3.895635  
H -2.801831 -1.145864 4.170441  
H -1.515599 -0.386068 5.128139  
H -3.874714 1.625100 3.229533  
H -2.730799 2.866598 2.688552  
H -2.695708 2.300941 4.372986  
H 0.910613 0.981890 2.415855  
H 0.476744 1.135229 4.118780  
H 0.135434 2.463851 3.023362  
H 0.082589 -3.377803 -1.113979  
H 1.173193 -2.190993 -1.853113  
H 1.840636 -3.462416 -0.798293  
H -0.225430 -3.413005 1.185979  
H 1.487286 -3.354611 1.572281  
H -0.210982 -2.602330 3.422369  
H 1.061844 -0.044587 2.255361  
H 0.269739 -0.273143 3.912847  
C 0.987665 -2.770572 -0.939894  
C 0.600997 -2.701643 1.391031  
C 3.461956 -1.626148 0.394074  
C 4.009098 -1.657407 1.687872  
C 5.388091 -3.545770 1.060548  
C 3.902576 -2.546781 -0.569051  
C 4.866279 -3.496199 -0.234739  
H 5.199652 -4.209885 -0.988680  
H 3.479198 -2.515369 -1.572644  
C 4.964225 -2.619449 2.016673  
H 3.674713 -0.930406 2.428272  
H 6.122314 -4.307131 1.324508  
H 5.373916 -2.649737 3.026865  
N -0.949442 0.452880 -2.430123  
C 0.121508 1.138603 -3.141913  
C -1.981524 -0.012097 -3.333635  
C -0.306369 2.431348 -3.788462  
C -0.184300 2.710450 -5.088159  
H -1.579408 -0.722261 -4.087789  
H -2.769648 -0.533918 -2.776767  
H -2.463530 0.809750 -3.896782  
H 0.949048 1.366134 -2.429207  
H 0.581527 0.496506 -3.925941  
H -0.798374 3.151864 -3.127011  
H 0.277222 1.997817 -5.776290  
H -0.535520 3.651947 -5.512205  
Si -3.245088 -0.655451 0.603261  
C -1.538497 3.263327 -0.147031  
C 0.906471 3.508767 -0.472714  
H 0.716543 3.638906 -1.547064  
H 1.827707 2.917519 -0.361863  
C 1.045045 4.843201 0.199025  
C 0.875750 6.022412 -0.403347  
H 1.297905 4.814651 1.265654  
H 0.626729 6.085700 -1.465208  
H 0.993383 6.964392 0.133578  
H -0.054387 2.647846 1.108455  
H -1.761746 3.206331 -1.219282  
H -2.277541 2.651829 0.382502  
H -1.611104 4.311278 0.183798

5•A  
E = -1875.458676a.u.  
N<sub>imag</sub> = 0

Y -0.457570 0.376313 -0.435618  
N 1.798954 0.595013 -0.726198  
Si -0.495660 0.752118 2.982097  
N 1.001342 -1.649952 -0.488463  
C 2.128867 -0.611755 -0.598958  
C 1.414866 -4.900801 0.753249  
C 1.868046 -3.647405 0.840623  
N -0.486636 2.855719 -0.205528  
N -1.325842 0.116342 1.618866  
C 1.286528 1.219512 2.519900  
C -0.314535 -0.465315 4.415739  
C -1.341460 2.309889 3.648871  
C -2.859735 -1.922422 0.188004  
C -4.258818 0.584219 1.260638  
C -3.320977 -1.586721 3.172632  
H -2.268469 -2.806306 0.470502  
H -2.449967 -1.540752 -0.763718  
H -3.880791 -2.265453 -0.036863  
H -4.120467 1.096230 0.296436  
H -4.286724 1.357522 2.043300  
H -5.244219 0.094729 1.236361  
H -3.456345 -0.907983 4.026973  
H -2.549363 -2.320640 3.443648  
H -4.268573 -2.127861 3.027187  
H 0.078910 -1.429424 4.060626  
H -1.269197 -0.661894 4.921188  
H 0.388161 -0.073123 5.166837  
H -2.377741 2.089833 3.946890  
H -1.386260 3.106455 2.890172  
H -0.820184 2.716922 4.528575  
H 1.909595 0.321443 2.392827  
H 1.726055 1.801620 3.344610  
H 1.416339 1.808342 1.599902  
H -0.321514 -2.802568 -1.661011  
H 0.837299 -1.811588 -2.578811  
H 1.372229 -3.330398 -1.792509  
H 1.209189 -1.741722 1.586992  
H -0.071590 -2.759905 0.926438  
H 2.937371 -3.465431 0.964256  
H 0.349342 -5.111784 0.628539  
H 2.084022 -5.760190 0.811193  
C 0.720248 -2.447450 -1.692202  
C 0.971790 -2.442297 0.773074  
C 3.533153 -1.099717 -0.460026  
C 4.022762 -2.257923 -1.082841  
C 6.227837 -1.848603 -0.170704  
C 4.416316 -0.316380 0.300644  
C 5.747973 -0.694678 0.457751  
H 6.417170 -0.086669 1.068238  
H 4.028349 0.594024 0.758198  
H 5.363966 -2.621993 -0.949217  
H 3.361001 -2.875624 -1.687225  
H 7.272479 -2.141044 -0.057363  
H 5.734434 -3.515163 -1.454208  
N -1.606825 0.412934 -2.291303  
C -3.008772 0.335057 -2.673842  
C -0.734669 0.620612 -3.438536  
C -3.322231 -0.903449 -3.474307  
C -3.669507 -0.913178 -4.764074  
H -0.980038 1.553373 -3.992264  
H 0.318187 0.714358 -3.111299  
H -0.770967 -0.203569 -4.177857  
H -3.624143 0.337463 -1.757407  
H -3.314596 1.226621 -3.265191  
H -3.185536 -1.851836 -2.943147  
H -3.797030 0.018996 -5.320800  
H -3.845389 -1.841607 -5.309509  
Si -2.865729 -0.650350 1.599679  
C -1.889458 3.317729 -0.188363  
C 0.327290 3.481229 -1.286804  
H -0.168905 3.247686 -2.240492  
H 1.301473 2.967013 -1.281017  
C 0.492565 4.963116 -1.127448  
C 0.002457 5.875822 -1.969458  
H 1.053773 5.290044 -0.244160  
H -0.557933 5.580567 -2.859786  
H 0.153150 6.944385 -1.812441  
H -0.055362 3.085798 0.696230  
H -2.373504 2.981808 -1.115473  
H -2.403535 2.852486 0.661306  
H -1.975261 4.413369 -0.116665

5•A  
E = -1875.467259a.u.  
N<sub>imag</sub> = 0

Y 0.119096 0.689807 -0.404471  
N 2.970056 -2.213329 -1.241759  
N 0.979301 -1.301606 -0.410985  
C 1.723163 -2.315951 -0.599266  
Si -3.039321 0.832011 1.007661  
C 3.098840 1.88439 -0.700367  
C 2.827744 1.490635 -0.955561  
N 0.015868 3.241398 -0.095073  
C -3.479264 2.565208 0.371551  
C -4.117686 0.545092 2.535333  
C -3.560442 -0.416784 -0.310103  
C -1.058521 1.097090 4.292391  
C 1.282280 0.307952 2.529867  
C -0.925154 -1.708690 3.025736  
H -2.114848 0.960157 4.560705  
H -0.885566 2.175600 4.158334  
H -0.451201 0.764614 5.148380  
H 1.604086 1.332405 2.279262  
H 1.670911 -0.392059 1.773714  
H 1.777691 0.050366 3.477831  
H -0.582879 -2.280314 2.150269  
H -1.996941 -1.912356 3.164613  
H -0.394217 -2.08215 3.911956  
H -3.977907 1.335794 3.286052  
H -3.901557 -0.419538 3.016701  
H -5.180610 0.541287 2.248937  
H -3.343455 -1.440690 0.029441  
H -2.994342 -0.244604 -1.238574  
H -4.633817 -0.354796 -0.544996  
H -3.024248 2.769952 -0.609863  
H -3.147122 3.336552 1.083560  
H -4.565815 2.682690 0.241649  
H 3.170366 -3.166983 -3.133288  
H 3.098561 -4.254175 -1.725117  
H 4.581448 -3.318653 -2.043896  
H 2.697400 -0.630140 -2.644656  
H 4.346697 -0.894452 -2.032799  
H 3.373156 -0.106168 0.317213  
H 2.615785 1.845873 -1.967060  
H 2.903728 2.239245 -0.166236  
N -1.347698 -0.729174 1.304847  
C 3.283104 -0.877987 -1.736403  
C 1.347009 -3.652708 -0.038853  
C 3.482193 -3.293537 -2.079869  
C 2.263521 -4.447268 0.666228  
C 0.509470 -6.026527 1.203346  
C 0.005556 -4.055106 -0.106331  
C -0.408273 -5.239525 0.499666  
H -1.453024 -5.545702 0.433934  
H -0.704696 -3.410169 -0.624464  
C 1.843721 -5.623129 1.291490  
H 3.302519 -4.124276 0.746166  
H 0.182918 -6.946875 1.688891  
H 2.560009 -6.223006 1.854739  
C -1.701597 1.956652 -2.959346  
N -0.859689 0.958717 -2.335258  
C -0.738489 -0.237362 -3.177671  
C 0.128044 0.009470 -4.383447  
C -0.300659 0.048232 -5.648354  
H -1.749141 2.869494 -2.345429  
H -2.747201 1.602895 -3.088212  
H -1.342374 2.259723 -3.962816  
H -1.735129 -0.601665 -3.507297  
H -0.290969 -1.050932 -2.575171  
H 1.176928 0.241075 -4.161261  
H -1.344549 -0.160653 -5.895620  
H 0.366670 0.281152 -6.479668  
Si -0.604821 0.125682 2.734126  
C 0.624718 4.109943 -1.120374  
C 0.235922 3.728504 1.292441  
H 1.318050 3.702291 1.495153  
H -0.256716 2.991459 1.945814  
C -0.309540 5.100973 1.552036  
C 0.423648 6.154780 1.917534  
H -1.392900 5.211082 1.427425  
H 1.505288 6.074182 2.050540  
H -0.025738 7.129388 2.110155  
H -1.002681 3.233791 -0.239372  
H 1.708311 4.154945 -0.950745  
H 0.445161 3.671434 -2.109375  
H 0.234095 5.139225 -1.096309

5''•A  
E = -1875.467521 a.u.  
N<sub>imag</sub> = 0

Y -0.898680 -0.024104 -0.641087  
N 2.615272 -2.693137 -0.006963  
N 0.899045 -1.194735 -0.636505  
C 2.099908 -1.437299 -0.278733  
Si -3.436515 0.723774 1.298354  
C 3.949455 -3.247536 1.986275  
C 4.403824 -4.388642 2.507696  
N 0.489744 1.976175 -0.158888  
C -3.574350 1.649809 2.939454  
C -5.085746 -0.124146 0.945384  
C -3.197251 2.074748 -0.028773  
C -2.831246 -1.767545 3.791682  
C 0.064672 -1.503407 2.874206  
C -1.869196 -3.291332 1.321317  
H -3.896101 -1.821012 3.522082  
H -2.693075 -0.901221 4.454002  
H -2.590979 -2.671940 4.371367  
H 0.201744 -0.574418 3.448572  
H 0.752444 -1.487624 2.016619  
H 0.350143 -2.346416 3.521632  
H -1.231953 -3.271777 0.424001  
H -2.906477 -3.453425 0.992433  
H -1.564401 -4.156855 1.929123  
H -5.281917 -0.917072 1.682098  
H -5.072824 -0.595358 -0.048780  
H -5.930731 0.580277 0.977072  
H -2.938683 1.722318 -1.043858  
H -2.441020 2.812917 0.279443  
H -4.142221 2.626973 -0.143457  
H -2.609701 2.101420 3.215256  
H -3.875007 0.980384 3.757038  
H -4.320963 2.456331 2.876436  
H 1.392390 -4.162581 0.922329  
H 0.860674 -3.564251 -0.674756  
H 2.262092 -4.687479 -0.547883  
H 4.429836 -3.743862 -0.045228  
H 4.550341 -2.012704 0.334251  
H 3.510013 -2.484955 2.637475  
H 4.830173 -5.170655 1.874388  
H 4.372296 -4.584249 3.579882  
N -2.102053 -0.350099 1.211003  
C 3.957461 -2.919984 0.517394  
C 3.033370 -0.263645 -0.123829  
C 1.733778 -3.845819 -0.075831  
C 3.257781 0.313795 1.137630  
C 4.483484 2.137868 0.117770  
C 3.544468 0.380577 -1.263440  
C 4.267653 1.568074 -1.142372  
H 4.663884 2.052818 -2.035876  
H 3.357435 -0.055394 -2.245692  
C 3.971823 1.508359 1.255526  
H 2.849230 -0.169494 2.026862  
H 5.046048 3.067201 0.211260  
H 4.129026 1.948746 2.241055  
C -3.167910 -0.081074 -3.134012  
N -1.820453 0.045928 -2.615423  
C -0.811608 0.095634 -3.669335  
C -0.886086 1.356374 -4.492475  
C -1.170578 1.406371 -5.796471  
H -3.885889 -0.146453 -2.301901  
H -3.292777 -0.997941 -3.747985  
H -3.475064 0.771192 -3.771930  
H -0.878519 -0.782376 -4.348610  
H 0.194346 0.031801 -3.197884  
H -0.760972 2.290598 -3.932247  
H -1.329585 0.491628 -6.373122  
H -1.254682 2.351369 -6.335164  
Si -1.721390 -1.661479 2.264678  
C 0.380710 2.367260 1.262389  
C 0.413814 3.124353 -1.099599  
H -0.597043 3.553317 -1.033841  
H 0.527373 2.708562 -2.113273  
C 1.452564 4.180080 -0.857080  
C 1.176410 5.451214 -0.559425  
H 2.492784 3.845466 -0.926759  
H 0.145663 5.804346 -0.476092  
H 1.964296 6.187685 -0.398122  
H 1.401821 1.515411 -2.286199  
H -0.596677 2.834924 1.435905  
H 0.441606 1.465388 1.883416  
H 1.169443 3.072846 1.563495

## S14

$$E = -2088.411896a.u.$$

$$N_{\text{imag}} = 0$$

|    |           |           |           |
|----|-----------|-----------|-----------|
| Y  | -0.632239 | -0.339569 | -0.529396 |
| N  | 3.762998  | -0.874856 | 0.233371  |
| N  | 1.538088  | -0.566444 | -0.475924 |
| C  | 2.692110  | -0.103533 | -0.196651 |
| Si | -1.155642 | -0.734814 | 2.922392  |
| C  | 5.533020  | -0.212626 | 1.855597  |
| C  | 4.737776  | -0.384548 | 2.913252  |
| N  | -0.346185 | -2.825948 | -0.976174 |
| N  | -0.386757 | 2.185477  | -0.194444 |
| C  | -1.757213 | 0.610849  | 4.112111  |
| C  | 0.734011  | -0.581191 | 2.824521  |
| C  | -3.877755 | -1.734913 | -0.477033 |
| C  | -4.225559 | 1.065696  | 0.709538  |
| C  | -4.614504 | -1.410992 | 2.439363  |
| H  | -3.695404 | -2.793515 | -0.237318 |
| H  | -3.237895 | -1.474757 | -1.335934 |
| H  | -4.921103 | -1.644552 | -0.815200 |
| H  | -5.304753 | 1.060474  | 0.494171  |
| H  | -3.720512 | 1.519234  | -0.157272 |
| H  | -4.055060 | 1.725533  | 1.573515  |
| H  | -4.507478 | -0.868502 | 3.389370  |
| H  | -4.357103 | -2.463853 | 2.621275  |
| H  | -5.676691 | -1.371042 | 2.152697  |
| H  | -2.849770 | 0.571934  | 4.232912  |
| H  | -1.501406 | 1.616616  | 3.750680  |
| H  | -1.309900 | 0.489124  | 5.110588  |
| H  | 1.077256  | 0.346140  | 2.345524  |
| H  | 1.189516  | -1.410225 | 2.264548  |
| H  | 1.146039  | -0.600341 | 3.845243  |
| H  | -1.169745 | -3.240163 | 3.139004  |
| H  | -2.532894 | -2.529113 | 4.024678  |
| H  | -0.898971 | -2.464480 | 4.713619  |
| H  | 2.563755  | -2.493382 | 0.785332  |
| H  | 3.642736  | -2.831643 | -0.588169 |
| H  | 4.319144  | -2.707126 | 1.068993  |
| H  | 5.826235  | -1.009181 | -0.111592 |
| H  | 5.175191  | 0.623565  | -0.079692 |
| H  | 6.583658  | 0.060162  | 2.000292  |
| H  | 3.687174  | -0.656977 | 2.794653  |
| H  | 5.110369  | -0.255865 | 3.929241  |
| N  | -1.860777 | -0.619770 | 1.358613  |
| C  | 5.105829  | -0.357047 | 0.417253  |
| C  | 2.927105  | 1.382539  | -0.287612 |
| C  | 3.565850  | -2.305525 | 0.380324  |
| C  | 3.007299  | 2.182322  | 0.863663  |
| C  | 2.988820  | 4.188432  | -0.496513 |
| C  | 2.893424  | 2.007387  | -1.546009 |
| C  | 2.932451  | 3.397781  | -1.650495 |
| H  | 2.912305  | 3.867001  | -2.635261 |
| H  | 2.823024  | 1.386826  | -2.440043 |
| C  | 3.023737  | 3.575526  | 0.758078  |
| H  | 3.048912  | 1.706669  | 1.843877  |
| H  | 3.004289  | 5.275687  | -0.576288 |
| H  | 3.063933  | 4.184705  | 1.662046  |
| C  | -2.648560 | 0.464882  | -3.136473 |
| N  | -1.398534 | 0.020545  | -2.561606 |
| C  | -0.361078 | -0.171099 | -3.575607 |
| C  | 0.130666  | 1.144250  | -4.123697 |
| C  | -0.213310 | 1.661538  | -5.307426 |
| H  | -3.401210 | 0.608005  | -2.346561 |
| H  | -3.066185 | -0.270354 | -3.858684 |
| H  | -2.564453 | 1.426590  | -3.684684 |
| H  | -0.721186 | -0.808651 | -4.414161 |
| H  | 0.497635  | -0.701283 | -3.116875 |
| H  | 0.741930  | 1.736140  | -3.433647 |
| H  | -0.830539 | 1.097306  | -6.011217 |
| H  | 0.106999  | 2.656778  | -5.619814 |
| Si | -3.555808 | -0.671153 | 1.059261  |
| C  | -1.009888 | -3.482578 | -2.112979 |
| C  | -0.418841 | -3.601185 | 0.284087  |
| H  | -1.476588 | -3.684260 | 0.571903  |
| H  | 0.071796  | -2.990710 | 1.058445  |
| C  | 0.225813  | -4.954568 | 0.214685  |
| C  | -0.415612 | -6.109082 | 0.408088  |
| H  | 1.297406  | -4.962398 | -0.016988 |
| H  | -1.483469 | -6.129955 | 0.638304  |
| H  | 0.097204  | -7.007079 | 0.353533  |
| H  | 0.647447  | -2.653199 | -1.182945 |
| H  | -2.080876 | -3.578029 | -1.892853 |
| H  | -0.904256 | -2.847980 | -3.000287 |
| H  | -0.606589 | -4.486601 | -2.324053 |
| C  | -1.471406 | -2.395949 | 3.775557  |
| C  | -0.544474 | 2.665016  | 1.191268  |
| C  | -1.168976 | 3.007829  | -1.158839 |
| H  | -2.229135 | 2.939706  | -0.872649 |
| H  | -1.066040 | 2.525109  | -2.141004 |
| C  | -0.736152 | 4.441552  | -1.219746 |
| C  | -1.513197 | 5.484422  | -0.917754 |
| H  | 0.300406  | 4.608170  | -1.531527 |
| H  | -2.547954 | 5.345254  | -0.595236 |
| H  | -1.153288 | 6.511422  | -0.991899 |
| H  | 0.606807  | 2.267019  | -0.447885 |
| H  | -1.573856 | 2.470630  | 1.516509  |
| H  | 0.132324  | 2.105419  | 1.844938  |
| H  | -0.328011 | 3.740434  | 1.292348  |

$$E = -2088.383771a.u.$$

$$N_{\text{imag}} = 1 (1021i)$$

|    |           |           |           |
|----|-----------|-----------|-----------|
| Y  | -0.764544 | -0.250321 | -0.334356 |
| N  | -2.056631 | -0.439875 | 1.507560  |
| N  | 1.530903  | 0.131787  | -0.419324 |
| N  | 3.786543  | 0.238749  | -1.090262 |
| C  | 2.478475  | 0.681533  | -1.091117 |
| C  | 6.005752  | 1.153731  | -1.646559 |
| C  | 7.215187  | 0.623099  | -1.839535 |
| N  | -0.931155 | 2.262697  | -0.250480 |
| N  | 0.628830  | -2.209965 | -0.162113 |
| H  | 1.425733  | -1.092821 | -0.118692 |
| C  | -1.422105 | -1.400728 | 4.329973  |
| C  | -3.896805 | -1.771700 | -0.370002 |
| C  | -4.935290 | 0.471501  | 1.404031  |
| C  | -4.248137 | -2.228664 | 2.608424  |
| H  | -3.258183 | -2.663609 | -0.470273 |
| H  | -3.648636 | -1.081965 | -1.191737 |
| H  | -4.937487 | -2.099388 | -0.512835 |
| H  | -4.361958 | -1.785354 | 3.607574  |
| H  | -3.531611 | -3.058272 | 2.688918  |
| H  | -5.224090 | -2.649368 | 2.321128  |
| H  | -1.086568 | -2.367911 | 3.928233  |
| H  | -2.437056 | -1.538845 | 4.724914  |
| H  | -0.765575 | -1.146209 | 5.176649  |
| H  | -4.811371 | 1.168762  | 0.563473  |
| H  | -4.821727 | 1.047861  | 2.333877  |
| H  | -5.968839 | 0.093844  | 1.370484  |
| H  | -3.153574 | 1.338766  | 4.037017  |
| H  | -2.041656 | 2.380819  | 3.134632  |
| H  | -1.582395 | 1.772787  | 4.739930  |
| H  | 0.829769  | 0.826313  | 1.893317  |
| H  | 1.074081  | -0.693664 | 2.755629  |
| H  | 0.909715  | 0.818172  | 3.657475  |
| Si | -1.331923 | -0.041670 | 3.018170  |
| H  | 3.836129  | -1.859468 | -0.715089 |
| H  | 3.614588  | -0.814715 | 0.707916  |
| H  | 5.216216  | -0.904209 | -0.090181 |
| H  | 4.231354  | 1.268892  | -2.843000 |
| H  | 4.947576  | -0.351267 | -2.750491 |
| H  | 5.898401  | 2.078103  | -1.070225 |
| H  | 7.343305  | -0.303774 | -2.404032 |
| H  | 8.118768  | 1.094198  | -1.451934 |
| C  | 4.727858  | 0.560584  | -2.166551 |
| C  | 2.189434  | 1.946813  | -1.845030 |
| C  | 4.131333  | -0.901377 | -0.254770 |
| C  | 2.824565  | 3.150708  | -1.503669 |
| C  | 1.388242  | 4.367453  | -3.025393 |
| C  | 1.160297  | 1.964534  | -2.799674 |
| C  | 0.768768  | 3.166999  | -3.390983 |
| H  | -0.026400 | 3.164262  | -4.137337 |
| H  | 0.640246  | 1.035868  | -3.043927 |
| C  | 2.417441  | 4.355140  | -2.080800 |
| H  | 3.619115  | 3.142154  | -0.755847 |
| H  | 1.072162  | 5.307624  | -3.478437 |
| H  | 2.901509  | 5.287519  | -1.787435 |
| C  | -2.232295 | 0.901862  | -3.229402 |
| N  | -1.614795 | -0.070144 | -2.356519 |
| C  | -1.607241 | -1.404698 | -2.958759 |
| C  | -0.659579 | -1.491483 | -4.125800 |
| C  | -1.031565 | -1.600106 | -5.404423 |
| H  | -2.171594 | 1.911032  | -2.795178 |
| H  | -3.308985 | 0.688797  | -3.409662 |
| H  | -1.754697 | 0.952946  | -4.228919 |
| H  | -2.623221 | -1.719896 | -3.281325 |
| H  | -1.294760 | -2.147993 | -2.193493 |
| H  | 0.401380  | -1.373770 | -3.879719 |
| H  | -2.084626 | -1.705480 | -5.677479 |
| H  | -0.307016 | -1.597304 | -6.220095 |
| Si | -3.694503 | -0.957182 | 1.323934  |
| C  | -0.080230 | 3.059788  | 0.652821  |
| C  | -2.372509 | 2.605523  | -0.119289 |
| H  | -2.663436 | 2.411062  | 0.920930  |
| H  | -2.934737 | 1.893644  | -0.744672 |
| C  | -2.696759 | 4.013647  | -0.520188 |
| C  | -3.209379 | 4.930826  | 0.302891  |
| H  | -2.478270 | 4.278964  | -1.561217 |
| H  | -3.434910 | 4.691390  | 1.344620  |
| H  | -3.433542 | 5.944164  | -0.032024 |
| H  | -0.631455 | 2.465090  | -1.213602 |
| H  | -0.382559 | 2.866919  | 1.689010  |
| H  | 0.960052  | 2.743726  | 0.524211  |
| H  | -0.160258 | 4.140488  | 0.458573  |
| C  | -2.092233 | 1.507471  | 3.801074  |
| C  | 1.155206  | -2.968329 | -1.290154 |
| C  | 0.511863  | -3.040687 | 1.047603  |
| H  | -0.010250 | -3.989303 | 0.814722  |
| H  | -0.123601 | -2.508218 | 1.773120  |
| C  | 1.851210  | -3.340291 | 1.661394  |
| C  | 2.439994  | -4.539423 | 1.675799  |
| H  | 2.383254  | -2.475503 | 2.073856  |
| H  | 1.936523  | -5.419786 | 1.268226  |
| H  | 3.432592  | -4.691751 | 2.102483  |
| C  | 0.529896  | 0.261328  | 2.787018  |
| H  | 0.430786  | -3.711754 | -1.673791 |
| H  | 1.393836  | -2.281608 | -2.116598 |
| H  | 2.083165  | -3.517918 | -1.038211 |

$$E = -2088.407519 a.u.$$

$$N_{\text{imag}} = 0$$

|    |           |           |           |
|----|-----------|-----------|-----------|
| Y  | -0.603737 | -0.459297 | 0.007670  |
| N  | -2.196900 | -0.405578 | 1.0611360 |
| N  | 1.832857  | -0.258210 | 1.1601310 |
| N  | 4.099878  | -0.306665 | -0.532891 |
| C  | 2.841937  | 0.219979  | -0.566793 |
| C  | 6.374258  | 0.560079  | -0.925641 |
| C  | 7.577698  | -0.004546 | -1.044254 |
| N  | -0.408203 | 2.137212  | 0.170744  |
| N  | -0.039609 | -2.615520 | 0.075864  |
| H  | 2.047285  | -1.141106 | 0.584229  |
| C  | -1.951647 | -1.753660 | 4.335738  |
| C  | -4.014280 | -1.353790 | -0.509487 |
| C  | -4.824039 | 1.024755  | 1.225420  |
| C  | -4.785137 | -1.764574 | 2.401750  |
| H  | -3.539077 | -2.345892 | -0.556749 |
| H  | -3.530841 | -0.721895 | -1.270083 |
| H  | -5.071736 | -1.476489 | -0.788627 |
| H  | -4.891056 | -1.328188 | 3.405489  |
| H  | -4.270036 | -2.730016 | 2.506861  |
| H  | -5.798621 | -1.961924 | 2.019549  |
| H  | -1.697189 | -2.710317 | 3.857143  |
| H  | -3.013912 | -1.791089 | 4.609921  |
| H  | -1.368125 | -1.678624 | 5.266620  |
| H  | -4.507994 | 1.693346  | 0.012562  |
| H  | -4.683337 | 1.564099  | 2.174238  |
| H  | -5.903067 | 0.844170  | 1.101965  |
| H  | -3.179039 | 1.288908  | 4.245235  |
| H  | -1.825980 | 2.183136  | 3.532618  |
| H  | -1.621270 | 1.359298  | 5.095740  |
| H  | 0.778451  | 0.547354  | 2.522388  |
| H  | 0.722230  | -1.226337 | 2.652074  |
| H  | 0.759126  | -0.225073 | 4.107965  |
| Si | -1.554774 | -0.298244 | 3.197847  |
| H  | 3.879028  | -2.370905 | -0.055073 |
| H  | 4.013185  | -1.265063 | 1.345104  |
| H  | 5.450712  | -1.616265 | 0.360451  |
| H  | 4.687302  | 0.734451  | -2.240658 |
| H  | 5.351251  | -0.905017 | -2.116893 |
| H  | 6.253974  | 1.482326  | -0.349035 |
| H  | 7.171773  | -0.927873 | -1.611622 |
| H  | 8.466277  | 0.436727  | -0.592698 |
| C  | 5.122013  | 0.008271  | -1.541641 |
| C  | 2.622221  | 1.466013  | -1.357864 |
| C  | 4.367585  | -1.456776 | 0.322680  |
| C  | 3.268270  | 2.652961  | -0.980662 |
| C  | 2.077635  | 3.857704  | -2.705562 |
| C  | 1.706617  | 1.478254  | -2.418666 |
| C  | 1.445388  | 2.674003  | -3.094293 |
| H  | 0.737215  | 2.673468  | -3.922277 |
| H  | 1.169000  | 0.567165  | -2.685436 |
| C  | 2.989794  | 3.846390  | -1.646165 |
| H  | 3.969196  | 2.641216  | -0.144748 |
| H  | 1.861528  | 4.789723  | -3.228861 |
| H  | 3.480467  | 4.768706  | -3.134297 |
| C  | -1.629818 |           |           |

TS[5•A-6•A]  
E = -1875.460146a.u.  
N<sub>imag</sub> = 1 (157i)

|    |           |           |           |
|----|-----------|-----------|-----------|
| Y  | 0.025708  | 0.542822  | -0.062031 |
| N  | -0.808304 | 0.752801  | -2.145566 |
| N  | 0.923680  | -1.491018 | -0.174640 |
| N  | 2.467161  | -2.811236 | 0.920154  |
| C  | 1.259505  | -2.651375 | 0.254761  |
| C  | 2.634048  | -0.507867 | 0.178132  |
| C  | 2.499564  | 0.870869  | 0.475999  |
| N  | -0.309977 | 3.068279  | 0.091422  |
| C  | 0.255115  | 0.766096  | -4.983550 |
| C  | 1.729640  | 2.187026  | -2.787471 |
| C  | -0.942290 | 3.287095  | -3.738131 |
| C  | -3.031987 | -0.783675 | -0.965405 |
| C  | -1.346716 | -2.012055 | -3.188478 |
| C  | -3.310243 | 0.287633  | -3.772245 |
| H  | -3.648941 | 0.075106  | -0.661801 |
| H  | -2.406423 | -1.059010 | -0.102026 |
| H  | -3.710579 | -1.629602 | -1.151818 |
| H  | -2.859524 | 0.516556  | -4.748442 |
| H  | -3.771337 | 1.211412  | -3.391961 |
| H  | -4.115547 | -0.443106 | -3.944122 |
| H  | -1.026270 | 3.935219  | -2.852292 |
| H  | -1.965208 | 3.070386  | -4.078363 |
| H  | -0.439311 | 3.868925  | -4.525538 |
| H  | -0.609268 | -2.405662 | -2.473925 |
| H  | -0.840303 | -1.871872 | -4.153993 |
| H  | -2.131634 | -2.771616 | -3.323548 |
| H  | -0.690553 | 0.459707  | -5.451810 |
| H  | 0.855994  | -1.140876 | -4.822845 |
| H  | 0.790955  | 1.403840  | -5.703241 |
| H  | 2.361112  | 1.304928  | -2.603330 |
| H  | 1.756698  | 2.807264  | -1.879246 |
| H  | 2.212337  | 2.771896  | -3.585400 |
| Si | -0.013521 | 1.681819  | -3.350855 |
| H  | 2.429140  | -3.525686 | 2.914122  |
| H  | 2.100164  | -4.744077 | 1.652489  |
| H  | 3.762842  | -4.150162 | 1.898047  |
| H  | 2.724352  | -1.167722 | 2.228197  |
| H  | 4.150067  | -1.593279 | 1.244308  |
| H  | 2.995501  | -0.752300 | -0.826187 |
| H  | 2.586433  | 1.183021  | 1.520350  |
| H  | 2.862522  | 1.590177  | -0.258705 |
| C  | 3.052040  | -1.506546 | 1.224818  |
| C  | 0.399372  | -3.834514 | -0.024748 |
| C  | 2.701487  | -3.863486 | 1.897267  |
| C  | 0.917890  | -4.995195 | -0.616966 |
| C  | -1.305400 | -5.947389 | -0.713520 |
| C  | -0.977906 | -3.738711 | 0.215431  |
| C  | -1.824437 | -4.793248 | -0.119904 |
| H  | -2.894176 | -4.709258 | 0.073803  |
| H  | -1.373376 | -2.824304 | 0.657064  |
| C  | 0.065489  | -6.043878 | -0.965424 |
| H  | 1.985620  | -5.060114 | -0.830756 |
| H  | -1.969431 | -6.768010 | -0.987246 |
| H  | 0.472235  | -6.935816 | -1.443477 |
| C  | -2.491493 | 0.447087  | 2.289480  |
| N  | -1.134482 | 0.355014  | 1.796418  |
| C  | -0.199263 | 0.001362  | 2.861985  |
| C  | -0.346600 | -1.425471 | 3.324034  |
| C  | -0.766173 | -1.802995 | 4.534868  |
| H  | -3.175383 | 0.726210  | 1.475997  |
| H  | -2.591627 | 1.213770  | 3.090029  |
| H  | -2.869956 | -0.501697 | 2.719984  |
| H  | -0.294157 | 0.681333  | 3.738362  |
| H  | 0.836638  | 0.141928  | 2.490050  |
| H  | -0.153903 | -2.182605 | 2.557420  |
| H  | -0.987755 | -1.065687 | 5.310938  |
| H  | -0.904895 | -2.853071 | 4.796966  |
| Si | -2.047861 | -0.387730 | -2.533869 |
| C  | 0.255310  | 3.641854  | 1.326409  |
| C  | -1.785974 | 3.249228  | -0.006104 |
| H  | -2.227764 | 2.765187  | 0.876183  |
| H  | -2.105662 | 2.686910  | -0.899090 |
| C  | -2.218315 | 4.681991  | -0.096175 |
| C  | -2.947910 | 5.310456  | 0.828797  |
| H  | -1.895988 | 5.226386  | -0.991447 |
| H  | -3.286750 | 4.792326  | 1.729081  |
| H  | -3.244816 | 6.353847  | 0.716952  |
| H  | 0.118361  | 3.524004  | -0.720602 |
| H  | -0.134310 | 3.066832  | 2.177549  |
| H  | 1.346333  | 3.532561  | 1.304450  |
| H  | -0.004392 | 4.703833  | 1.464994  |

6•A  
E = -1875.476412a.u.  
N<sub>imag</sub> = 0

|    |           |           |           |
|----|-----------|-----------|-----------|
| Y  | 0.404801  | 0.706535  | 0.267476  |
| N  | -0.615078 | 0.935334  | -1.748722 |
| N  | 1.512607  | -1.388354 | 0.099058  |
| N  | 2.820465  | -0.308376 | 0.880888  |
| C  | 1.576312  | -2.633068 | 0.486231  |
| C  | 2.913938  | -0.796326 | 0.159852  |
| C  | 2.855983  | 0.648708  | 0.617367  |
| N  | 0.511890  | 3.211963  | 0.380342  |
| C  | -0.081443 | 0.985376  | -4.742031 |
| C  | 2.080721  | 1.659012  | -2.727369 |
| C  | -0.255086 | 3.565397  | -3.179115 |
| C  | -2.745836 | -0.483968 | -0.264932 |
| C  | -2.274169 | -1.162393 | -3.182856 |
| C  | -3.483018 | 1.524926  | -2.428666 |
| H  | -2.961133 | 0.288199  | 0.485110  |
| H  | -2.025151 | -1.185019 | 0.183352  |
| H  | -3.677033 | -1.049828 | -0.423052 |
| H  | -3.251687 | 1.954265  | -3.415134 |
| H  | -3.524375 | 2.354890  | -1.707213 |
| H  | -4.488804 | 1.081517  | -2.487969 |
| H  | 0.113797  | 4.171039  | -2.337871 |
| H  | -1.346696 | 3.692279  | -3.218949 |
| H  | 0.168317  | 4.002739  | -4.096380 |
| H  | -1.454347 | -1.881534 | -3.044496 |
| H  | -2.211489 | -0.792292 | -4.214819 |
| H  | -3.225643 | -1.707328 | -3.082001 |
| H  | -1.123201 | 1.109619  | -5.071657 |
| H  | 0.150830  | -0.088782 | -4.757617 |
| H  | 0.561313  | 1.482506  | -5.484855 |
| H  | 2.445634  | 0.623469  | -2.803991 |
| H  | 2.385826  | 2.028738  | -1.736100 |
| H  | 2.614684  | 2.257058  | -3.481543 |
| Si | 0.213182  | 1.730818  | -3.029625 |
| H  | 3.234078  | -4.326380 | 2.518200  |
| H  | 2.533782  | -5.100778 | 1.064235  |
| H  | 4.230386  | -4.564140 | 1.057661  |
| H  | 3.729990  | -1.533951 | 2.071223  |
| H  | 4.686302  | -2.041788 | 0.644268  |
| H  | 3.284749  | -0.841311 | -0.880872 |
| H  | 3.080955  | 0.726921  | 1.695862  |
| H  | 3.583149  | 1.271952  | 0.079618  |
| C  | 3.669947  | -1.843243 | 1.009867  |
| C  | 0.380576  | -3.497358 | 0.466058  |
| C  | 3.218759  | -4.320043 | 1.413079  |
| C  | 0.041777  | -4.351280 | 1.527639  |
| C  | -2.016713 | -4.946580 | 0.400783  |
| C  | -0.496211 | -3.373148 | -0.622631 |
| C  | -1.685785 | -4.096178 | -0.657351 |
| H  | -2.359193 | -3.983386 | -1.507042 |
| H  | -0.232972 | -2.688449 | -1.428192 |
| C  | -1.154120 | -5.068523 | 1.493287  |
| H  | 0.686448  | -4.418300 | 2.403184  |
| H  | -2.951726 | -5.507340 | 0.379691  |
| H  | -1.419744 | -5.714442 | 2.330576  |
| C  | -1.852363 | 1.052491  | 2.811910  |
| N  | -0.588306 | 0.667068  | 2.223846  |
| C  | 0.265595  | -0.016925 | 3.191143  |
| C  | -0.265445 | -1.374636 | 3.573090  |
| C  | -0.590809 | -1.764795 | 4.808502  |
| H  | -2.466275 | 1.600383  | 2.080536  |
| H  | -1.716023 | 1.721776  | 3.690494  |
| H  | -2.458936 | 0.194520  | 3.164740  |
| H  | 0.421455  | 0.588579  | 4.112334  |
| H  | 1.272240  | -0.148930 | 2.745426  |
| H  | -0.445082 | -2.046891 | 2.727644  |
| H  | -0.451597 | -1.102850 | 5.667253  |
| H  | -1.009869 | -2.752291 | 5.009664  |
| Si | -2.184027 | 0.246465  | -1.917801 |
| C  | 1.288655  | 3.660211  | 1.552634  |
| C  | -0.892892 | 3.705274  | 0.390530  |
| H  | -1.354315 | 3.339882  | 1.318879  |
| H  | -1.401412 | 3.217193  | -0.456809 |
| C  | -1.020217 | 5.196417  | 0.294559  |
| C  | -1.516901 | 5.974526  | 1.259100  |
| H  | -0.671210 | 5.649096  | -0.640361 |
| H  | -1.875473 | 5.549964  | 2.199867  |
| H  | -1.595241 | 7.056031  | 1.142748  |
| H  | 0.966656  | 3.551278  | -0.473505 |
| H  | 0.846083  | 3.202407  | 2.447759  |
| H  | 2.316032  | 3.292567  | 1.452401  |
| H  | 1.288004  | 4.755938  | 1.668832  |

TS[6•A-3•P]  
E = -1875.455411 a.u.  
N<sub>imag</sub> = 1 (1053i)

|    |           |           |           |
|----|-----------|-----------|-----------|
| Y  | 0.038393  | 0.628859  | 0.668514  |
| N  | -1.004263 | 0.960421  | -1.262801 |
| N  | 0.704949  | -1.615320 | 0.806707  |
| N  | 1.499732  | -3.652722 | 0.328680  |
| C  | 0.430188  | -2.805871 | 0.337343  |
| C  | 2.135593  | -1.557222 | 1.211128  |
| C  | 2.742871  | -0.225417 | 0.783699  |
| N  | 1.613759  | 2.322210  | 0.929069  |
| H  | 2.211551  | 1.152381  | 0.931829  |
| C  | 0.944022  | -0.892817 | -2.560202 |
| C  | 0.038903  | 1.570787  | -4.017891 |
| C  | -2.008093 | 3.190775  | 0.352242  |
| C  | -3.927127 | 0.994482  | -0.670726 |
| C  | -2.777630 | 3.071046  | -2.573597 |
| H  | -1.212251 | 3.890599  | 0.059528  |
| H  | -1.693905 | 2.710623  | 1.294510  |
| H  | -2.902714 | 3.784959  | 0.959317  |
| H  | -3.042190 | 2.470184  | -3.455531 |
| H  | -1.930652 | 3.716924  | -2.844185 |
| H  | -3.637691 | 3.719204  | -2.344838 |
| H  | 0.843792  | 2.187804  | -3.590654 |
| H  | -0.772669 | 2.246186  | -4.317956 |
| H  | 0.431916  | 1.092536  | -4.928394 |
| H  | -3.769839 | 0.373690  | 0.222860  |
| H  | -4.163753 | 0.314143  | -1.502139 |
| H  | -4.804196 | 1.634505  | -0.491083 |
| H  | -2.795670 | -0.090148 | -3.794455 |
| H  | -2.289001 | -1.500857 | -2.843279 |
| H  | -1.618939 | -1.234667 | -4.472257 |
| H  | 0.691155  | -1.796208 | -1.992823 |
| H  | 1.794412  | -0.405410 | -0.928571 |
| H  | 1.292130  | -1.208737 | -3.555588 |
| Si | -0.536725 | 0.270016  | -2.771439 |
| H  | 1.947930  | -5.129627 | -1.131710 |
| H  | 0.571419  | -5.488427 | -0.044193 |
| H  | 2.238697  | -5.586498 | 0.562479  |
| H  | 3.279790  | -2.686669 | -0.311320 |
| H  | 3.363475  | -3.411713 | 1.324004  |
| H  | 2.151659  | -1.624498 | 2.315341  |
| H  | 3.041964  | -0.281749 | -0.278032 |
| H  | 3.659281  | -0.027396 | 1.362479  |
| C  | 2.715021  | -2.871121 | 0.621256  |
| C  | -0.925737 | -3.121236 | -0.147954 |
| C  | 1.564728  | -5.030439 | -0.100236 |
| C  | -2.012467 | -2.495631 | 0.488608  |
| C  | -3.532642 | -3.489492 | -1.108057 |
| C  | -1.157496 | -3.917468 | -1.280891 |
| C  | -2.456147 | -4.099312 | -1.755917 |
| H  | -2.624708 | -4.702206 | -2.648336 |
| H  | -0.322650 | -4.356337 | -1.824820 |
| C  | -3.306596 | -2.684384 | 0.011570  |
| H  | -1.826488 | -1.850395 | 1.350194  |
| H  | -4.545750 | -3.627534 | -1.486706 |
| H  | -4.141217 | -2.191529 | 0.509340  |
| C  | -2.479201 | 0.746647  | 2.998872  |
| N  | -1.138491 | 0.540405  | 2.496693  |
| C  | -0.212015 | 0.118381  | 3.543629  |
| C  | -0.474182 | -1.285943 | 4.022309  |
| C  | -0.966836 | -1.600996 | 5.223370  |
| H  | -3.132600 | 1.108701  | 2.193474  |
| H  | -2.506335 | 1.501872  | 3.813177  |
| H  | -2.936447 | -0.175184 | 3.410829  |
| H  | -0.229759 | 0.816065  | 4.408966  |
| H  | 0.830549  | 0.162873  | 3.151765  |
| H  | -0.307059 | -2.069130 | 3.275508  |
| H  | -1.156212 | -0.830603 | 5.975341  |
| H  | -1.197234 | -2.630344 | 5.502430  |
| Si | -2.375264 | 1.995193  | -1.074659 |
| C  | 1.868117  | 3.071443  | 2.151160  |
| C  | 1.954424  | 3.049167  | -0.299431 |
| H  | 1.398505  | 4.004897  | -0.352488 |
| H  | 1.605826  | 2.446278  | -1.158638 |
| C  | 3.429749  | 3.312156  | -0.442643 |
| C  | 3.987161  | 4.524958  | -0.468974 |
| H  | 4.065065  | 2.420850  | -0.488849 |
| H  | 3.374646  | 5.428461  | -0.411648 |
| H  | 5.065690  | 4.664210  | -0.555502 |
| C  | -1.937541 | -0.732342 | -3.546117 |
| H  | 1.184295  | 3.934469  | 2.248089  |
| H  | 1.699318  | 2.420256  | 3.021867  |
| H  | 2.902944  | 3.455825  | 2.212330  |

## 3•P

$E = -1875.506757$  a.u.  
 $N_{\text{imag}} = 0$

Y 0.070653 0.737916 0.287740  
 N -1.069843 0.898575 -1.644667  
 N 1.592579 -1.117377 0.609020  
 N 2.096693 -3.127726 1.509303  
 C 1.166438 -2.316700 0.919324  
 C 3.006785 -1.002493 1.052980  
 C 3.902599 -0.345554 0.015937  
 N 1.518803 2.367329 0.393402  
 H 4.928858 -0.254046 0.398659  
 C -2.593085 2.719299 0.065404  
 C -4.005505 0.366857 -1.332433  
 C 1.408737 -0.269738 -2.751955  
 C 0.053307 1.955003 -4.249833  
 C -1.282661 -0.790834 -4.115890  
 H 1.382471 -1.251470 -2.258793  
 H 2.017433 0.395744 -2.120202  
 H 1.957354 -0.396281 -3.697755  
 H -2.278366 -0.397410 -4.370585  
 H -1.431740 -1.720037 -3.546044  
 H -0.777433 -1.053436 -5.057848  
 H -3.837806 -0.305694 -0.479312  
 H -4.061296 -0.253877 -2.239530  
 H -4.985092 0.849178 -1.194101  
 H 0.628489 2.727889 -3.718990  
 H -0.869504 2.421342 -4.618943  
 H 0.643641 1.640926 -5.124513  
 H -2.3170893 2.219989 -3.879245  
 H -2.344382 3.572230 -3.072921  
 H -4.060023 3.245968 -2.736952  
 H -1.907864 3.570557 -0.068948  
 H -2.284305 2.184008 0.980141  
 H -3.594034 3.130063 0.267084  
 Si -2.617325 1.641328 -1.493045  
 H 2.679122 -5.002532 0.733462  
 H 1.021916 -4.921677 1.397995  
 H 2.422846 -4.951768 2.501787  
 H 4.009088 -2.925284 0.631735  
 H 3.948307 -2.525762 2.373329  
 H 3.001809 -0.377456 1.963652  
 H 3.921979 -0.937628 -0.909508  
 H 3.528379 0.660897 -0.216928  
 C 3.399535 -2.451555 1.424994  
 C -0.237597 -2.718665 0.716608  
 C 2.051682 -4.578202 1.537187  
 C -0.870517 -2.426279 -0.501724  
 C -2.943676 -3.332533 0.346775  
 C -0.971521 -3.320622 1.751159  
 C -2.317708 -3.624823 1.562491  
 H -2.887706 -4.069886 2.378145  
 H -0.501453 -3.492895 2.718451  
 C -2.219361 -2.729250 -0.682252  
 H -0.304955 -1.965544 -1.310117  
 H -4.000781 -3.560212 0.208422  
 H -2.701950 -2.479014 -1.625951  
 C -2.307422 -0.143669 2.375857  
 N -0.963828 0.395832 2.186638  
 C -0.269750 0.557445 3.454844  
 C 0.163293 -0.760763 4.045431  
 C -0.436715 -1.379329 5.068141  
 H -2.780428 -0.344426 1.402070  
 H -2.957700 0.579600 2.915469  
 H -2.340300 -1.092083 2.948403  
 H -0.903991 1.101363 4.187675  
 H 0.619890 1.192089 3.287391  
 H 0.978616 -1.267570 3.516787  
 H -1.258416 -0.904683 5.610199  
 H -0.127690 -2.368785 5.411147  
 Si -0.297271 0.481933 -3.119875  
 C 2.427744 2.689034 1.474330  
 C 1.569893 3.366005 -0.678129  
 H 1.469178 4.393708 -0.267700  
 H 0.708208 3.203411 -1.349644  
 C 2.845978 3.271974 -1.473350  
 C 3.875082 4.119079 -1.373256  
 H 2.935104 2.393201 -2.121236  
 H 3.816873 5.003033 -0.732866  
 H 4.802849 3.971774 -1.928573  
 C -3.085306 2.772794 -2.932218  
 H 2.204887 3.675619 1.933079  
 H 2.350675 1.936904 2.277720  
 H 3.491433 2.719825 1.159655

## 2•N•A

$E = -2537.561352$  a.u.  
 $N_{\text{imag}} = 0$

Y 0.285521 0.441475 -0.087274  
 N -0.683546 0.590056 -2.112254  
 N 0.366640 -1.985444 -0.378080  
 N 2.472961 0.203062 -0.170452  
 C 0.461138 -3.140591 -0.468161  
 C 4.458805 1.534839 0.342004  
 C 5.709290 1.422198 -0.114737  
 N 0.384863 2.802594 0.902225  
 Si -2.468687 0.953213 1.937352  
 Si -1.904205 -0.543429 -2.582282  
 C 0.030349 1.167349 -5.011996  
 C 1.608599 2.397272 -2.773958  
 C -1.301568 3.275502 -3.257045  
 C 1.343961 -1.430122 2.836416  
 C -1.415104 -2.754392 2.610959  
 C -0.873418 -0.646810 4.719229  
 C -3.949154 -0.172536 2.272513  
 C -2.830950 1.974535 0.366457  
 C -2.461735 2.227085 3.343287  
 C -2.776198 -1.298486 -1.080587  
 C -1.155202 -1.951348 -3.608293  
 C -3.303751 0.223061 -3.600623  
 H -3.570953 -0.624006 -0.733721  
 H -2.126040 -1.530041 -0.220165  
 H -3.254732 -2.247362 -1.367948  
 H -2.962757 0.638439 -4.558677  
 H -3.790277 1.032194 -3.036311  
 H -4.069735 -0.536441 -3.822013  
 H -1.477610 3.667844 -2.244242  
 H -2.282901 2.989481 -3.661812  
 H -0.906207 4.095099 -3.876436  
 H -0.246567 -2.330910 -3.119931  
 H -0.865539 -1.599558 -4.608377  
 H -1.862091 -2.785902 -3.734413  
 H -0.927393 0.854999 -5.449961  
 H 0.720896 0.312599 -5.062246  
 H 0.441590 1.965935 -5.649056  
 H 1.903417 2.238749 -1.725561  
 H 1.713424 3.469962 -2.993474  
 H 2.354133 1.862096 -3.378762  
 H -3.859556 -0.657907 3.255526  
 H -4.038712 -0.962211 1.514898  
 H -4.884770 0.407422 2.276208  
 H -2.347712 1.608358 -0.552895  
 H -2.554790 3.034899 0.484360  
 H -3.914845 1.966025 0.175296  
 H -1.665200 2.975907 3.220310  
 H -2.316279 1.756418 4.324684  
 H -3.418489 2.771936 3.367565  
 H -1.318256 -3.083982 1.568018  
 H -2.489874 -2.655439 2.818328  
 H -1.023973 -3.551290 3.262804  
 H -1.949243 -0.534217 4.916676  
 H -0.381365 0.298423 4.992115  
 H -0.494906 -1.428349 5.396212  
 H 1.597608 -2.324824 3.426053  
 H 1.900785 -0.589394 3.276916  
 H 1.728115 -1.578296 1.816945  
 Si -0.131825 1.786961 -3.230862  
 H 3.690227 0.239446 -1.939603  
 H 2.078852 -0.487144 -2.127099  
 H 3.361020 -1.386429 -2.118180  
 H 4.197993 -0.535544 0.835138  
 H 3.176522 0.570015 1.766393  
 H 3.977646 2.520127 0.350882  
 H 6.206921 0.450133 -0.158642  
 H 6.281297 2.286228 -0.456274  
 N -0.972203 0.108281 1.783804  
 C 3.578104 0.383806 0.756472  
 C 0.550292 -4.553400 -0.543337  
 C 2.924671 -0.374832 -1.427669  
 C 0.349944 -5.208875 -1.773189  
 C 0.698561 -7.329953 -0.662382  
 C 0.821919 -5.287573 0.627714  
 C 0.893439 -6.675275 0.558110  
 H 1.101123 -7.249766 1.460670  
 H 0.965870 -4.760572 1.569819  
 C 0.427629 -6.597260 -1.822636  
 H 0.131008 -4.623708 -2.665723  
 H 0.756078 -8.417683 -0.709248  
 H 0.273094 -7.111370 -2.771142  
 Si -0.520986 -1.112610 2.917912  
 C 1.194283 2.681504 2.147399  
 H 2.232509 2.484790 1.848787  
 H 0.808430 1.790559 2.670039  
 C 1.141424 3.878427 3.049187  
 C 2.207625 4.606119 3.389360  
 H 0.156029 4.143003 3.448329  
 H 3.202861 4.363396 3.009033  
 H 2.130716 5.457492 4.066319  
 C 0.758242 3.982919 0.099363  
 H -0.595648 2.907560 1.186406  
 H 1.800970 3.878382 -0.223987  
 H 0.125639 4.027114 -0.794010  
 H 0.661920 4.922997 0.664233

## TS[2•N•A-7•A]

$E = -2537.539206$  a.u.  
 $N_{\text{imag}} = 1$  (121i)

Y -0.005189 0.350545 0.112539  
 N -1.275336 -0.062009 1.095472  
 N 0.681240 -1.890548 0.063522  
 N 2.306341 0.274412 -0.428743  
 C 1.861698 -1.701364 -0.078987  
 C 3.744593 2.209173 0.061201  
 C 4.929522 2.659787 -0.357076  
 N 0.194151 2.455664 1.694742  
 Si -0.787958 1.710568 -2.860916  
 Si -1.762117 -1.122089 -2.419610  
 N -1.013195 0.337883 -1.842262  
 C -3.307142 1.464281 0.406284  
 C -3.093906 1.859493 3.383363  
 C -4.208571 -0.762118 2.287916  
 C 0.333460 2.962924 -2.968912  
 C -2.384316 2.647215 -3.230939  
 C 0.032641 1.289294 -4.510833  
 C -0.478859 -2.254542 -3.220937  
 C -3.120287 -0.791356 -3.694111  
 C -2.579694 -2.052462 -0.998860  
 C -1.189907 -2.977868 2.670443  
 C -1.375387 -0.877959 4.673509  
 C 1.173632 -1.142205 3.309096  
 H -0.715589 -3.262895 1.721114  
 H -2.278020 -3.077409 2.550533  
 H -0.867767 -3.689681 3.446020  
 H 1.479267 -0.436708 4.094296  
 H 1.700180 -0.863935 2.386247  
 H 1.551606 -2.135353 3.595304  
 H -4.098725 -1.248092 3.267943  
 H -4.146060 -1.544208 1.519121  
 H -5.216479 -0.321983 2.247452  
 H -2.464812 -1.003851 4.947325  
 H -1.132697 0.142054 5.204671  
 H -0.914919 -1.582184 5.583924  
 H -4.311682 1.905441 0.498171  
 H -3.297569 0.810806 -0.473963  
 H -2.622123 2.299081 0.188290  
 H -2.936639 1.428420 4.381046  
 H -4.106965 2.290037 3.357952  
 H -2.382764 2.693037 3.274086  
 H 0.246600 -2.590628 -2.466588  
 H 0.067155 -1.732445 -0.202152  
 H -0.946796 -3.149153 -3.658971  
 H -2.741306 -0.309257 -4.606495  
 H -3.908964 -0.149575 -3.275638  
 H -3.586977 -1.742397 -3.993455  
 H -3.479134 -1.524990 -0.652254  
 H -1.910876 -2.188623 -0.138652  
 H -2.890729 -3.053135 -1.335537  
 H -2.928419 2.869351 -2.300996  
 H -3.056308 2.067808 3.878701  
 H -2.169324 3.601183 -3.737177  
 H 0.153266 2.192695 -5.127887  
 H -0.570410 0.573543 -5.087650  
 H 1.027497 0.845460 -4.365808  
 H -0.246959 3.623819 -1.315603  
 H 0.817963 3.605965 -2.718379  
 H 1.149994 2.520493 -1.376176  
 Si -0.724440 -1.211444 3.126735  
 H 2.785700 1.267633 -2.257178  
 H 1.805861 -0.209440 -2.241382  
 H 3.556569 -0.320413 -2.058358  
 H 4.343266 0.161535 -0.189247  
 H 3.179220 0.661172 1.431423  
 H 2.907661 2.907849 0.163803  
 H 5.775791 1.982656 -0.494585  
 H 5.099286 3.715040 -0.574011  
 C 2.631337 0.252644 -1.855175  
 C 3.431628 0.768203 0.362156  
 C 3.163788 -2.332060 -0.195758  
 C 4.050884 -2.355882 0.891841  
 C 5.678415 -3.525618 -0.465951  
 C 3.540874 -2.908501 -1.419763  
 C 4.796370 -3.501714 -1.549014  
 H 5.083792 -3.951667 -2.499720  
 H 2.840953 -2.898312 -2.254837  
 C 5.300838 -2.957284 0.753818  
 H 3.748718 -1.918798 1.842913  
 H 6.658413 -3.992081 -0.570347  
 H 5.982507 -2.984053 1.604438  
 Si -2.889341 0.559227 2.017481  
 C 1.327500 2.486455 2.657660  
 H 2.167335 3.005609 2.171856  
 H 1.636799 1.447980 2.835847  
 C 0.997094 3.135747 3.973536  
 C 0.866764 2.463988 5.119661  
 H 0.852454 4.220169 3.972805  
 H 1.007164 1.382253 5.164961  
 H 0.614120 2.966296 6.053905  
 C -0.284123 3.800998 1.339996  
 H -0.559565 1.936930 2.178478  
 H 0.508244 4.344907 0.808379  
 H -1.150410 3.717882 0.672840  
 H -0.592231 4.391771 2.217290



## S17

7•A  
E = -2537.557383 a.u.  
N<sub>imag</sub> = 0

Y -0.145946 0.363315 0.142629  
N -1.470048 -0.111138 1.929240  
N 1.111710 -1.478033 0.242578  
N 2.277115 0.257268 -0.900913  
C 2.048454 -1.204333 -0.555085  
C 3.252494 2.390225 -0.162798  
C 4.270677 3.183871 -0.500380  
N 0.275086 2.231340 1.874445  
Si -1.149138 1.763085 -2.795376  
Si -1.609594 -1.223361 -2.479317  
N -1.074666 0.310831 -1.873415  
C -3.450797 1.405967 0.323568  
C -3.482073 1.655802 3.319732  
C -4.382720 -0.950707 1.979071  
C -0.236772 3.108865 -1.810263  
C -2.884738 2.444683 -3.094875  
C -0.352300 1.627149 -4.504636  
C -0.346139 -1.996310 -3.652230  
C -3.252794 -1.103134 -3.405262  
C -1.849317 -2.403685 -1.030811  
C -1.247178 -3.057506 2.501064  
C -1.830502 -1.100796 4.774889  
C 0.883324 -1.132467 3.492992  
H -0.589838 -3.265386 1.645561  
H -2.286462 -3.216827 2.181631  
H -1.017971 -3.785175 3.294598  
H 1.105596 -0.202473 4.034197  
H 1.494812 -1.197456 2.581604  
H 1.185282 -1.967452 4.143844  
H -4.291864 -1.553606 2.893209  
H -4.262936 -1.629770 1.122518  
H -5.405512 -0.545614 1.946017  
H -2.922059 -1.210255 4.712709  
H -1.612736 -0.123968 5.230681  
H -1.461516 -1.875260 5.465021  
H -4.476626 1.804435 0.352921  
H -3.350717 0.784102 -0.574970  
H -2.785056 2.274476 0.189795  
H -3.329709 1.206173 4.309744  
H -4.525725 2.002257 3.265634  
H -2.842167 2.549681 3.253222  
H 0.614520 -2.169222 -3.145845  
H -0.157399 -1.352575 -4.523316  
H -0.698239 -2.969807 -4.026851  
H -3.164187 -0.508199 -4.326030  
H -4.030636 -0.640859 -2.780379  
H -3.603143 -2.106044 -3.693265  
H -2.584613 -2.024428 -0.307089  
H -0.910739 -2.583153 -0.484601  
H -2.210260 -3.378754 -1.391274  
H -3.426511 2.613694 -2.155138  
H -3.486037 1.758743 -3.707043  
H -2.825302 3.404363 -3.631832  
H -0.373892 2.600982 -5.017646  
H -0.909355 0.915777 -5.132367  
H 0.690594 1.287567 -4.465207  
H -0.108028 4.010608 -2.427209  
H 0.771763 2.811795 -1.483042  
H -0.813078 3.419049 -0.926782  
Si -0.958834 -1.297017 3.102690  
H 2.274177 1.592898 -2.534214  
H 1.699107 -0.050871 -2.891558  
H 3.451307 0.268211 -2.710358  
H 4.341895 0.569549 -0.372189  
H 3.169012 0.557010 0.958925  
H 2.275092 2.829087 0.059678  
H 5.253414 2.774719 -0.745047  
H 4.162525 4.267922 -0.540447  
C 2.446735 0.527134 -2.338770  
C 3.327363 0.896537 -0.078389  
C 2.894566 -2.231660 -1.233091  
C 4.219798 -2.025257 -1.647096  
C 4.362468 -4.308218 -2.437422  
C 2.320520 -3.499984 -1.426402  
C 3.042036 -4.525403 -2.030663  
H 2.575524 -5.499279 -2.183433  
H 1.297811 -3.652300 -1.082141  
C 4.950771 -3.058243 -2.236571  
H 4.702203 -1.061844 -1.493453  
H 4.931443 -5.111631 -2.906824  
H 5.984277 -2.885101 -2.539311  
Si -3.108646 0.441529 1.913907  
C 1.494139 2.251595 2.702626  
C 2.184350 3.002762 2.288918  
H 2.005730 1.279727 2.594785  
C 1.287648 2.502426 4.173573  
C 0.128778 2.417281 4.828754  
H 2.202087 2.735580 4.728081  
H -0.810743 2.172349 4.329509  
H 0.076103 2.580343 5.904634  
C -0.312125 3.574983 1.722706  
H -0.421541 1.610316 2.339354  
H 0.310305 4.177833 1.047753  
H -1.313190 3.487855 1.282454  
H -0.403083 4.100595 2.685594

7•A  
E = -2537.567632 a.u.  
N<sub>imag</sub> = 0

Y 0.386267 0.595034 0.126846  
N -0.879241 0.435764 1.958820  
N 1.168764 -1.408851 -0.043299  
N 2.401306 -2.587441 1.534348  
C 1.552792 -2.528366 0.437341  
C 3.162162 -0.297401 1.067750  
C 3.139917 1.047252 1.232340  
N 1.035017 3.088581 0.036107  
Si 0.233344 0.222852 -3.187327  
Si -0.905541 1.428471 3.370022  
C -1.172001 -2.386568 2.922796  
C -2.134870 -1.588033 0.138807  
C -3.656467 -0.632444 2.552539  
C -3.022208 1.984944 -0.429382  
C -3.311763 0.584182 -3.117102  
C -2.080858 3.340497 -3.003306  
C -0.403368 -1.518258 -3.524673  
C 2.094165 0.091780 -2.823762  
C 0.121523 1.209201 -4.800934  
C 0.694099 2.431938 3.581235  
C -1.019639 0.459405 4.992522  
C -2.339490 2.662064 3.359817  
H 0.969548 3.052105 2.718085  
H 1.541849 1.772016 3.816127  
H 0.572099 3.115888 4.435078  
H -3.301764 2.131449 3.367548  
H -2.337220 3.301614 2.465700  
H -2.307235 3.316947 4.244031  
H -4.134771 1.169218 1.971688  
H -3.676766 -0.339842 3.611514  
H -4.274769 -1.537398 2.447962  
H -0.180980 -0.244857 5.092803  
H -1.951522 -0.115018 5.081102  
H -0.978103 1.154556 5.845317  
H -1.195391 -2.169181 3.998997  
H -0.123361 2.546438 2.634534  
H -1.722047 -3.324624 2.754347  
H -1.191101 -1.828946 -0.370721  
H -2.686769 -0.869985 -0.481286  
H -2.725840 -2.516292 0.175860  
H -1.444642 -1.498973 -3.874657  
H -0.368654 -2.115732 -2.603902  
H 0.200448 -2.031444 -4.288895  
H 2.301353 -0.450031 -1.888393  
H 2.587435 1.074118 -2.794754  
H 2.572516 -0.482018 -3.632890  
H 0.507465 2.231966 -4.677385  
H -0.909001 1.282258 -5.176168  
H 0.722270 0.718001 -5.582064  
H -3.421000 -0.412466 -2.665580  
H -2.950258 0.446087 -4.146193  
H -4.311997 1.040731 -3.175108  
H -1.684880 3.220308 -4.021058  
H -1.449677 4.080934 -2.490056  
H -3.090242 3.772954 -5.857011  
H -3.356813 3.029304 -0.340894  
H -2.402889 1.756043 0.449941  
H -3.917710 1.351179 -0.350303  
Si -1.909955 -0.970796 1.909095  
H 2.559986 -4.029386 3.091592  
H 2.783634 -4.638488 1.432601  
H 4.072020 -3.683007 2.204254  
H 1.923402 -0.891522 2.723038  
H 3.602555 -1.473867 2.797404  
H 3.668108 -0.719078 1.954988  
H 2.745913 1.505233 2.140878  
H 3.620544 1.701315 0.503954  
N -0.587233 0.980451 -1.861211  
C 2.753911 -1.299305 2.116117  
C 1.078357 -3.811785 -0.172528  
C 2.980847 -3.793289 2.099031  
C 0.335764 -4.753128 0.555164  
C -0.001903 -0.064005 -1.451961  
C 1.271527 -4.009193 -1.546932  
H 0.744815 -5.133296 -2.180714  
H 0.904441 -5.276394 -3.250005  
H 1.822907 -3.257945 -2.112063  
C -0.209211 -5.867704 -0.084583  
H 0.160810 -4.597322 1.619621  
H -0.427258 -6.935806 -1.950372  
H -0.802816 -6.582546 0.486969  
Si -2.152463 1.674522 -2.093105  
C -0.158239 3.924307 0.286020  
C 1.663332 3.388133 -1.281862  
H 0.942075 3.080229 -2.051368  
H 2.539527 2.726516 -1.373591  
C 2.077057 4.818446 -1.462128  
C 1.578009 5.621499 -2.404508  
H 2.834998 5.201410 -0.768350  
H 0.820758 5.264402 -3.106247  
H 1.910100 6.654169 -2.515744  
H 1.724962 3.284196 0.768181  
H -0.910295 3.698280 -0.476159  
H -0.576660 3.677025 1.267392  
H 0.063952 5.001571 2.468872

7''•A  
E = -2537.581632 a.u.  
N<sub>imag</sub> = 0

Y -0.512508 0.333542 0.146559  
N -1.453436 0.496346 -1.874341  
N 0.940611 -1.193207 -0.146462  
N 1.923110 -2.741848 -1.626428  
C 1.957785 -1.665979 -0.754628  
C 3.492994 -4.510029 -0.821749  
C 2.914775 -4.592137 0.378029  
N 1.431346 1.514113 1.256788  
Si -2.711918 1.571245 2.099710  
Si -2.998564 -0.181227 -2.229406  
C -1.203486 2.371750 -4.220809  
C 0.512424 -0.173457 -4.065408  
C 0.966076 2.103901 -2.109360  
C -3.761829 -1.705261 3.367183  
C -1.021179 -1.079395 4.534145  
C -1.241326 -2.792796 2.019330  
C -4.566715 1.445357 1.791984  
C -2.023865 2.791216 0.795723  
C -2.442001 2.376676 3.786816  
C -3.457410 -1.436964 -0.895025  
C -3.030653 -1.100495 -3.882860  
C -4.332844 1.155568 -2.284397  
H -3.450030 -0.995486 0.112220  
H -2.748925 -2.279620 -0.893202  
H -4.461854 -1.848642 -1.075346  
H -4.128333 1.872866 -3.092860  
H -4.364115 1.721531 -1.341953  
H -5.334073 0.731192 -2.453890  
H 1.587633 1.461042 -1.464420  
H 0.532394 2.918028 -1.507529  
H 1.665319 2.570324 -2.848938  
H -2.296871 -1.919854 -3.890503  
H -2.802263 -0.437551 -4.730216  
H -4.024294 -1.537938 -4.064370  
H -1.679002 3.187795 -3.657153  
H -1.984770 1.886423 -4.823799  
H -0.475175 2.815831 -4.916359  
H -0.194272 -0.749078 -4.679548  
H 1.030738 -0.883170 -3.403373  
H 1.257113 0.273812 -4.742072  
H -5.054239 0.831981 2.562386  
H -4.773147 0.978138 0.818891  
H -5.042840 2.437607 1.799963  
H -2.157154 2.459074 -0.249829  
H -0.963327 3.050524 0.955519  
H -2.575546 3.738997 0.878770  
H -1.370478 2.511122 3.996877  
H -2.859090 1.751646 4.590155  
H -2.927166 3.362690 3.847455  
H -1.347018 -0.176110 5.070040  
H 0.060653 -0.991081 4.359131  
H -1.178811 -1.940379 5.201837  
H -0.242579 -2.578308 1.608923  
H -1.878149 -3.099220 1.176812  
H -1.156733 -3.648985 2.505703  
H -4.384081 -1.807562 2.466545  
H -4.207916 -0.921659 3.997620  
H -3.818001 -2.651324 3.926951  
Si -0.381709 1.141915 -3.067230  
H 0.680893 -3.946259 -2.794842  
H -0.130102 -2.587989 -1.944959  
H 0.332283 -4.047446 -1.041007  
H 3.967667 -2.834560 -2.056126  
H 2.979097 -4.050505 -2.856417  
H 4.320060 -5.182099 -1.075369  
H 2.087715 -3.938955 0.662050  
H 3.248387 -5.319714 1.117582  
N -1.856713 0.096165 1.902487  
C 3.121060 -3.522810 -1.898838  
C 3.270542 -0.944464 -0.607982  
C 0.630384 -3.373024 -1.860054  
C 3.893658 -0.870141 0.647562  
C 5.498505 0.724662 -0.216871  
C 3.786308 -0.184193 -1.670353  
C 4.885116 0.654894 -1.470687  
H 5.263989 1.255964 -2.298501  
H 3.304104 -0.237857 -2.647586  
C 5.003420 -0.047302 0.840235  
H 3.491237 -1.461026 1.470766  
H 6.360696 1.374697 -0.063995  
H 5.481733 -0.003153 1.819516  
Si -1.973096 -1.299984 2.912201  
C 1.494082 0.878318 2.590971  
C 1.747627 2.965101 1.310303  
H 1.058332 3.435829 2.027090  
H 1.536999 3.383929 0.314927  
C 3.174576 3.238780 1.686086  
C 3.558954 3.883637 2.789477  
H 3.925872 2.846974 0.991366  
H 2.829677 4.276058 3.502317  
H 4.611782 4.052949 3.017780  
H 2.145307 1.047992 0.678986  
H 0.669867 1.253367 3.209326  
H 1.366916 -0.203969 2.463189  
H 2.452005 1.070197 3.099138

## TS[7•A-2•PP]

E = -2537.550307 a.u.

N<sub>imag</sub> = 1 (1163i)

Y -0.449184 0.570011 -0.210619  
 N -1.816470 0.197000 1.505250  
 N 1.181686 -0.973984 0.010767  
 N 1.208781 -2.838810 1.419818  
 C 1.785867 -1.719658 0.877567  
 C 1.508595 -4.244566 3.424831  
 C 1.057908 -5.444561 3.796504  
 N 1.721502 1.499414 -0.583595  
 N 1.749200 0.145006 -0.275774  
 Si -1.108595 0.591622 3.028278  
 C -3.710206 -1.282858 -0.239980  
 C -4.660062 1.108464 1.423964  
 C -3.932754 -1.532642 2.772516  
 C -1.616917 3.099259 -0.677395  
 C -4.026473 2.209363 -2.351337  
 C -1.483922 3.214735 -3.722618  
 C -3.063217 -0.785893 -4.282393  
 C -0.875867 -2.224362 -2.680220  
 C -0.120935 -0.125407 -4.751015  
 C 0.500679 1.528906 2.684316  
 C -0.611468 -0.925970 4.035906  
 C -2.191610 1.705569 4.100030  
 H 0.373567 2.425329 2.056174  
 H 1.263464 0.885452 2.221020  
 H 0.936039 1.876967 3.632976  
 H -3.128313 1.208052 4.389176  
 H -2.456029 2.628772 3.564051  
 H -1.667329 1.989106 5.025413  
 H -3.878565 -1.057340 3.762551  
 H -3.273609 -2.413062 2.786293  
 H -4.964902 -1.889272 2.634130  
 H 0.049561 -1.572062 3.440399  
 H -1.481375 -1.526808 4.333448  
 H -0.072710 -0.634878 4.950995  
 H -3.112733 -2.206827 -0.258770  
 H -3.418879 -0.677944 -1.109723  
 H -4.766007 -1.569393 -0.357812  
 H -4.408279 1.858108 0.660241  
 H -4.628130 1.611228 2.401107  
 H -5.696577 0.784377 1.245452  
 H -3.360014 0.129102 -4.816649  
 H -3.853608 -1.021968 -3.555521  
 H -3.026179 -1.601349 -5.020555  
 H -1.645444 -2.608278 -1.995145  
 H 0.063896 -2.130625 -2.114662  
 H -0.723997 -2.975973 -3.469355  
 H 0.898558 -0.089732 -4.340233  
 H -0.330240 0.855937 -5.199792  
 H -0.125408 -0.871456 -5.560467  
 H -4.459172 1.596627 -1.549085  
 H -4.380915 1.798564 -3.307414  
 H -4.425402 3.230490 -2.255980  
 H -1.789602 2.777999 -4.684799  
 H -0.385664 3.256670 -3.709565  
 H -1.867756 4.245612 -3.690237  
 H -0.519662 3.211241 -0.573350  
 H -2.031780 2.663424 0.250671  
 H -2.009249 4.125278 -0.715725  
 Si -3.456758 -0.347334 1.376471  
 H -0.528202 -3.948656 1.716965  
 H -0.800325 -2.262914 1.178105  
 H -0.236405 -3.490812 0.003392  
 H 1.937085 -4.816055 1.402715  
 H 3.037782 -3.593382 2.067998  
 H 1.531888 -3.422201 4.145901  
 H 1.012980 -6.277344 3.090250  
 H 0.724948 -5.642471 4.815498  
 N -1.464230 0.617119 -2.172724  
 C 1.988283 -3.916158 2.041190  
 C 3.124947 -1.298182 1.398317  
 C -0.165919 -3.156917 1.050718  
 C 4.151249 -0.975367 0.499823  
 C 5.519582 -0.172258 2.326347  
 C 3.308553 -1.050007 2.767548  
 C 4.497410 -0.482735 3.226909  
 H 4.622338 -0.274982 4.290265  
 H 2.501086 -1.272628 3.466113  
 C 5.344788 -0.424334 0.962641  
 H 3.996499 -1.140065 -0.565979  
 H 6.448176 0.272047 2.685955  
 H 6.135310 -0.176439 0.253867  
 Si -2.145347 2.191033 -2.285082  
 C 2.738718 2.230324 0.161748  
 C 1.884890 1.706288 -2.037629  
 H 2.018334 2.782690 -2.263077  
 H 0.959381 1.391697 -2.549854  
 C 3.039853 0.918305 -2.590195  
 C 4.192429 1.440190 -3.020404  
 H 2.908740 -0.169854 -2.575907  
 H 4.349043 2.522012 -3.043411  
 H 5.012841 0.815400 -3.377034  
 Si -1.393788 -0.570684 -3.426776  
 H 2.564464 3.323804 0.128981  
 H 2.739866 1.923539 1.214815  
 H 3.754901 2.045661 -0.231841

## 2•PP

E = -2537.579323 a.u.

N<sub>imag</sub> = 0

Y 0.042550 0.928112 0.218449  
 N -1.117375 0.722998 2.136713  
 N 1.793196 -0.681497 0.092479  
 N 3.044957 -2.558433 -0.553536  
 C 1.989009 -1.975309 0.072459  
 C 3.295699 -4.828784 -1.545944  
 C 2.676198 -4.490804 -2.678211  
 N 1.732324 2.329288 0.215189  
 H 2.565521 -0.140595 -0.314937  
 Si -2.588962 -0.157382 1.966481  
 C 0.023711 3.233424 3.261073  
 C 0.809934 0.488024 4.383574  
 C -1.950572 1.647372 4.913544  
 C -1.606562 3.475527 -0.050546  
 C -3.750246 2.371839 -1.927268  
 C -1.377536 3.904522 -3.057075  
 C -2.571069 -0.471874 -3.700265  
 C 0.135542 -1.398485 -2.722487  
 C -0.035490 0.950004 -4.624314  
 C -2.458374 -1.207595 0.392999  
 C -4.093780 0.967183 1.761001  
 C -2.991125 -1.312792 3.418371  
 H -1.640627 -1.941401 0.452711  
 H -2.315217 -0.590730 -0.509923  
 H -3.387887 -1.775500 0.237701  
 H -3.679209 -0.826970 4.124409  
 H -2.089519 -1.597021 3.975164  
 H -3.473112 -2.263620 3.064067  
 H -2.293653 0.674717 5.290869  
 H -2.825601 2.187340 4.523282  
 H -1.564486 2.220733 5.770365  
 H -3.985242 1.640899 0.900306  
 H -4.234178 1.591681 2.655485  
 H -5.015114 0.382000 1.615001  
 H -0.820110 3.891635 3.006017  
 H 0.731914 3.275173 2.420773  
 H 0.520061 3.651389 4.150237  
 H 1.654717 0.369224 3.687242  
 H 0.461547 -0.518488 4.661753  
 H 1.198143 0.970947 5.293098  
 H -3.192605 0.345720 -4.091227  
 H -3.120831 -0.937961 -2.869647  
 H -2.465283 -1.220693 -4.500333  
 H -0.262428 -1.933912 -1.848568  
 H 1.188890 -1.155454 -2.526675  
 H 0.101984 -2.088306 -3.579436  
 H 0.943480 1.372203 -4.354584  
 H -0.639988 1.768876 -5.038510  
 H 0.121949 0.213763 -5.427726  
 H -4.094092 1.531420 -1.308567  
 H -4.014285 2.143635 -2.969567  
 H -4.317669 3.266791 -1.629819  
 H -1.655739 3.561970 -4.063960  
 H -0.291367 4.073948 -3.052450  
 H -1.873252 4.872790 -2.888408  
 H -0.555974 3.756864 0.130408  
 H -1.946176 2.868987 0.804997  
 H -2.190728 4.407067 -0.015362  
 Si -0.600540 1.483362 3.598526  
 H 4.624226 -2.375299 -1.903063  
 H 4.568696 -1.091397 -0.653763  
 H 3.421227 -1.069849 -2.003078  
 H 2.866373 -4.355851 0.500603  
 H 4.502359 -3.953438 -0.007718  
 H 3.740921 -5.822681 -1.440495  
 H 2.219038 -3.508256 -2.811367  
 H 2.599294 -5.190945 -3.509377  
 N -0.966383 1.194299 -1.766264  
 C 3.447846 -3.946204 -0.337637  
 C 0.993110 -2.834457 0.764378  
 C 3.970802 -1.724656 -1.313471  
 C 0.341350 -3.888250 0.106530  
 C -0.919485 -4.360229 2.116738  
 C 0.671634 -2.539341 2.096528  
 C -0.266197 -3.316031 2.773751  
 H -0.496980 -3.095818 3.814687  
 H 1.159912 -1.702918 2.594247  
 C -0.621039 -4.639183 0.780262  
 H 0.577063 -4.106264 -0.934469  
 H -1.669000 -4.950973 2.643871  
 H -1.143016 -5.440860 0.257494  
 Si -1.891550 2.653663 -1.738155  
 C 2.821976 2.170993 1.153674  
 C 2.145173 3.065369 -0.980871  
 H 2.801450 3.921249 -0.722363  
 H 1.255068 3.476548 -1.482900  
 C 2.859000 2.118764 -1.909928  
 C 4.188678 1.982451 -2.006729  
 H 2.201321 1.435285 -2.460656  
 H 4.866470 2.661619 -1.484433  
 H 4.648498 1.217738 -2.635867  
 Si -0.878629 2.050249 -3.132545  
 H 3.182418 3.141658 1.553392  
 H 2.503895 1.566820 2.018986  
 H 3.711160 1.661078 0.714677

## TS[7•A-8•A]

E = -2537.561796 a.u.

N<sub>imag</sub> = 1 (201i)

Y 0.572271 0.495000 -0.115846  
 N -0.352429 0.805133 -2.123870  
 N 1.501016 -1.517197 -0.447791  
 N 3.419300 -2.749199 -0.162764  
 C 2.048780 -2.661506 -0.222523  
 C 3.139032 -0.438657 -0.813518  
 C 3.080214 0.900357 -0.354901  
 N 0.870606 2.928562 0.633141  
 Si -2.362420 0.931840 1.807320  
 Si -1.311644 -0.565668 -2.605650  
 C 0.247054 1.478998 -0.515555  
 C 1.408343 3.153476 -2.838275  
 C -1.585125 3.258745 -3.357115  
 C -0.767552 -2.441836 2.884059  
 C -0.491033 -0.022667 4.717594  
 C 1.774188 -0.766176 2.874319  
 C -3.625795 -0.388464 2.301730  
 C -2.949666 1.660406 0.147908  
 C -2.555001 2.312951 3.098802  
 C -1.951566 -1.513545 -1.097821  
 C -0.300751 -1.762309 -3.665260  
 C -2.868697 -0.095591 -3.571543  
 H -2.723811 -0.940346 -0.570501  
 H -1.186079 -1.802046 -0.365214  
 H -2.418960 -2.446326 -1.449653  
 H -2.648044 0.392369 -4.531069  
 H -3.500068 0.585299 -2.982772  
 H -3.460195 -0.998484 -3.788737  
 H -1.864634 3.665597 -2.374676  
 H -2.468661 2.737062 -3.749927  
 H -1.370916 4.108225 -4.023663  
 H 0.645138 -1.999366 -3.156819  
 H -0.053436 -1.321722 -4.640648  
 H -0.843239 -2.702070 -3.552229  
 H -0.589933 0.908635 -5.440999  
 H 1.138054 0.834629 -5.039355  
 H 0.433657 2.336388 -5.680420  
 H 2.334649 2.562274 -2.824304  
 H 1.329291 3.698417 -1.888150  
 H 1.520735 3.915558 -3.624601  
 H -3.458336 -0.752039 3.325974  
 H -3.581666 -1.255488 1.627321  
 H -4.645906 0.023831 2.260068  
 H -3.809933 1.088577 -0.230013  
 H -2.191833 1.648938 -0.649047  
 H -3.285769 2.700411 0.271908  
 H -1.828588 3.127696 2.966190  
 H -2.425712 1.929767 4.120020  
 H -3.562547 2.752685 3.032266  
 H -1.567402 -0.029861 4.940274  
 H -0.127753 1.006443 4.854121  
 H 0.004464 -0.657101 5.468814  
 H 2.154655 -1.237240 3.793664  
 H 2.248514 0.223023 2.798926  
 H 2.117816 -1.375049 2.027940  
 H -0.654169 -2.842810 1.867905  
 H -1.834915 -2.487556 3.140443  
 H -0.226839 -3.109589 3.571814  
 Si -0.103734 2.085349 -3.256738  
 H 4.657688 -4.030256 0.994160  
 H 3.605734 -4.828749 -0.206511  
 H 5.047406 -3.929579 -0.744554  
 H 4.255396 -1.119397 0.899236  
 H 5.009327 -1.481677 -0.676139  
 H 3.045938 -0.586938 -1.894586  
 H 3.576234 1.135468 0.590859  
 H 3.092174 1.694987 -1.102192  
 N -0.745977 0.325721 1.171309  
 C 4.047921 -1.436188 -0.140491  
 C 1.225472 -3.875229 0.033185  
 C 4.221297 -3.943852 -0.016469  
 C 1.403111 -4.626289 1.205055  
 C -0.475756 -6.025608 0.607283  
 C 0.187410 -4.208018 -0.846226  
 C -0.654153 -5.282296 -0.562697  
 H -1.458888 -5.534848 -1.253878  
 H 0.043907 -3.609884 -1.743874  
 C 0.552621 -5.693027 1.492119  
 H 2.185196 -4.348007 1.912213  
 H -1.143021 -6.857769 0.833896  
 H 0.683295 -6.256275 2.416594  
 Si -0.122447 -0.670978 2.977161  
 C 1.299019 2.998271 2.044921  
 C -0.303514 3.798304 0.357509  
 H -1.115569 3.473280 1.017779  
 H -0.625387 3.594947 -0.673991  
 C -0.035518 5.262846 0.537212  
 C -0.647563 6.033336 1.439407  
 H 0.718032 5.700579 -0.128142  
 H -1.404274 5.622946 2.121444  
 H -0.427739 7.097451 1.532016  
 H 1.649789 3.244163 0.046554  
 H 0.528960 2.519750 2.662086  
 H 2.233077 2.434979 2.159431  
 H 1.457781 4.033103 2.787035

**8•A**  
 $E = -2537.584213 \text{ a.u.}$   
 $N_{\text{imag}} = 0$

|    |           |           |           |
|----|-----------|-----------|-----------|
| Y  | 0.201637  | 0.539048  | 0.335072  |
| N  | -1.057450 | 0.261376  | 2.160297  |
| N  | 1.559578  | -1.400453 | 0.812855  |
| N  | 3.510793  | -2.532470 | 0.850565  |
| C  | 2.229898  | -2.433978 | 0.385326  |
| C  | 2.478435  | -0.570056 | 1.687937  |
| C  | 2.556541  | 0.804485  | 1.048291  |
| N  | 0.426763  | 3.030033  | 0.322103  |
| Si | -2.175916 | 1.275060  | -2.073616 |
| Si | -1.061783 | 1.209754  | 3.598939  |
| C  | -1.057647 | -2.627003 | 2.995763  |
| C  | -2.081376 | -1.778774 | 0.258326  |
| C  | -3.702809 | -1.105784 | 2.712116  |
| C  | 2.176107  | -0.109344 | -2.520939 |
| C  | 0.334968  | 0.986437  | -4.643379 |
| C  | -0.196949 | -1.776667 | -3.474692 |
| C  | -2.148934 | 2.930795  | -3.000632 |
| C  | -3.125458 | 1.570884  | -0.447299 |
| C  | -3.251485 | 0.121683  | -3.119964 |
| C  | 0.412861  | 2.402467  | 3.666758  |
| C  | -0.934954 | 0.168251  | 5.174597  |
| C  | -2.628949 | 2.258958  | 3.744954  |
| H  | 0.267339  | 3.298158  | 3.046265  |
| H  | 1.353555  | 1.919036  | 3.366530  |
| H  | 0.538969  | 2.759690  | 4.700097  |
| H  | -3.515751 | 1.622625  | 3.875168  |
| H  | -2.796416 | 2.861012  | 2.839500  |
| H  | -2.577147 | 2.946030  | 4.603471  |
| H  | -4.251802 | -0.311455 | 2.186236  |
| H  | -3.732854 | -0.879415 | 3.787694  |
| H  | -4.243206 | -2.052335 | 2.557894  |
| H  | -0.014397 | -0.433653 | 5.179510  |
| H  | -1.784866 | -0.520124 | 5.285681  |
| H  | -0.918475 | 0.818118  | 6.062951  |
| H  | -1.071858 | -2.464085 | 4.081880  |
| H  | -0.005400 | -2.680369 | 2.680225  |
| H  | -1.531536 | -3.601492 | 2.799148  |
| H  | -1.146162 | -1.829760 | -0.318751 |
| H  | -2.772273 | -1.137864 | -0.302741 |
| H  | -2.497572 | -2.798151 | 0.244635  |
| H  | -1.715377 | 2.818641  | -4.003902 |
| H  | -1.564420 | 3.700401  | -2.476330 |
| H  | -3.172596 | 3.318919  | -3.119852 |
| H  | -3.629616 | 2.548406  | -0.470266 |
| H  | -2.520101 | 1.534286  | 0.471217  |
| H  | -3.908814 | 0.809278  | -0.321442 |
| H  | -3.314650 | -0.879014 | -2.668693 |
| H  | -2.853110 | 0.004680  | -4.138397 |
| H  | -4.274323 | 0.519670  | -3.208079 |
| H  | 0.652364  | 2.024600  | -4.467110 |
| H  | -0.664968 | 1.013507  | -5.099923 |
| H  | 1.022414  | 0.545720  | -5.381991 |
| H  | -1.213739 | -1.775394 | -3.891356 |
| H  | -0.210335 | -2.414748 | -2.580489 |
| H  | 0.471299  | -2.245730 | -4.212077 |
| H  | 2.337700  | -0.646493 | -1.576674 |
| H  | 2.614593  | 0.893108  | -2.411589 |
| H  | 2.749384  | -0.637663 | -3.298293 |
| Si | -1.930894 | 1.227799  | 2.068850  |
| H  | 5.365862  | -3.428330 | 0.422123  |
| H  | 3.934075  | -4.461872 | 0.164469  |
| H  | 4.499812  | -4.116443 | 1.823326  |
| H  | 4.667415  | -0.877069 | 1.508097  |
| H  | 3.922602  | -1.856604 | 2.806999  |
| H  | 1.996215  | -0.494294 | 2.676734  |
| H  | 3.287222  | 0.786990  | 0.220716  |
| H  | 2.890642  | 1.564201  | 1.773708  |
| N  | -0.594853 | 0.653927  | -1.773385 |
| C  | 3.767130  | -1.442105 | 1.795524  |
| C  | 1.681362  | -3.416753 | -0.570932 |
| C  | 4.370931  | -3.694082 | 0.811618  |
| C  | 2.360201  | -3.718657 | -1.761313 |
| C  | 0.603818  | -5.262687 | -2.376443 |
| C  | 0.459891  | -4.043229 | -0.291837 |
| C  | -0.074811 | -4.963836 | -1.193064 |
| H  | -1.027728 | -5.444906 | -0.971781 |
| H  | -0.059384 | -3.803832 | 0.634291  |
| C  | 1.820351  | -4.636792 | -2.660182 |
| H  | 3.296367  | -3.209245 | -1.990719 |
| H  | 0.179483  | -5.975297 | -3.084092 |
| H  | 2.342534  | -4.852958 | -3.592433 |
| Si | 0.355667  | -0.024557 | -3.043324 |
| C  | -0.736223 | 3.916918  | 0.504011  |
| C  | 1.226156  | 3.354553  | -0.891333 |
| H  | 0.597230  | 3.147765  | -1.767424 |
| H  | 2.058962  | 2.632875  | -0.904495 |
| C  | 1.755789  | 4.756972  | -0.919247 |
| C  | 1.443340  | 5.656314  | -1.855283 |
| H  | 2.441010  | 5.032076  | -0.108940 |
| H  | 0.762008  | 5.406965  | -2.672193 |
| H  | 1.860570  | 6.663680  | -1.848503 |
| H  | 1.048996  | 3.106785  | 1.134767  |
| H  | -1.410988 | 3.800287  | -0.350852 |
| H  | -1.278246 | 3.620082  | 1.408704  |
| H  | -0.452235 | 4.978115  | 0.580315  |

**TS[8•A-2•P]**  
 $E = -2537.557664 \text{ a.u.}$   
 $N_{\text{imag}} = 1 (1082i)$

|    |           |           |           |
|----|-----------|-----------|-----------|
| Y  | 0.265688  | 0.474998  | 0.413398  |
| N  | -0.855288 | 0.271782  | 2.328394  |
| N  | 1.183752  | -1.732733 | 0.614575  |
| N  | 2.575628  | -3.501616 | 0.582744  |
| C  | 1.393964  | -2.950222 | 0.190353  |
| C  | 2.370373  | -1.307895 | 1.433744  |
| C  | 2.903952  | 0.011646  | 0.888373  |
| N  | 1.589449  | 2.402180  | 0.413455  |
| H  | 2.271949  | 1.327956  | 0.788240  |
| Si | -2.221065 | -0.779477 | 2.240075  |
| C  | -1.199635 | 2.748696  | 3.946856  |
| C  | -1.476626 | 1.193624  | 3.960224  |
| C  | -0.905878 | 0.078737  | 5.365595  |
| C  | -2.092000 | 2.716934  | 0.148079  |
| C  | -3.473399 | 1.556579  | -2.343631 |
| C  | -1.255960 | 3.613705  | -2.594670 |
| C  | -1.393137 | -1.551926 | -3.242529 |
| C  | 1.548299  | -0.760888 | -2.810467 |
| C  | -0.220699 | 0.907357  | -4.587779 |
| C  | -2.633142 | -1.143338 | 0.427850  |
| C  | -3.800034 | -0.033929 | 2.963907  |
| C  | -1.888443 | -2.434958 | 3.097695  |
| H  | -1.795041 | -1.484500 | -0.195466 |
| H  | -3.062383 | -0.265011 | -0.070537 |
| H  | -3.389939 | -1.942251 | 0.390161  |
| H  | -1.903866 | -2.326330 | 4.190971  |
| H  | -0.892106 | -2.810978 | 2.820369  |
| H  | -2.636979 | -3.195844 | 2.827829  |
| H  | -0.433630 | -0.913854 | 5.390068  |
| H  | -1.991574 | -0.060024 | 5.459040  |
| H  | -0.566887 | 0.600035  | 6.256562  |
| H  | -4.051652 | 0.906602  | 2.451821  |
| H  | -3.703680 | 0.186787  | 4.036038  |
| H  | -4.651641 | -0.720696 | 2.840888  |
| H  | -2.294443 | 2.647149  | 3.987738  |
| H  | -0.968930 | 3.379941  | 3.077549  |
| H  | -0.874954 | 3.282328  | 4.852999  |
| H  | 1.989399  | 1.528074  | 3.050167  |
| H  | 1.906475  | 0.219582  | 4.239336  |
| H  | 1.734880  | 1.904888  | 4.759713  |
| H  | -2.419881 | -1.186798 | -3.391617 |
| H  | -1.407626 | -2.215593 | -2.368037 |
| H  | -1.115381 | -2.155918 | -4.119132 |
| H  | 1.722477  | -1.275971 | -1.856374 |
| H  | 2.284680  | 0.052683  | -2.890730 |
| H  | 1.762035  | -1.477891 | -3.617758 |
| H  | 0.461012  | 1.767273  | -4.522398 |
| H  | -1.221134 | 1.287121  | -4.840140 |
| H  | 0.112898  | 0.275669  | -5.425746 |
| H  | -3.891914 | 0.687781  | -1.816577 |
| H  | -3.364004 | 1.277078  | -3.402333 |
| H  | -4.209741 | 2.373035  | -2.291876 |
| H  | -1.097628 | 3.392269  | -3.658113 |
| H  | -0.316039 | 4.017832  | -2.192933 |
| H  | -2.017143 | 4.406338  | -2.526207 |
| H  | -1.174318 | 3.153717  | -0.573937 |
| H  | -2.455947 | 1.959487  | 0.855369  |
| H  | -2.838259 | 3.525574  | 0.123343  |
| Si | 0.407849  | 1.038937  | 3.811161  |
| H  | 3.960654  | -4.885910 | -0.198976 |
| H  | 2.265640  | -5.442303 | -0.120801 |
| H  | 3.238705  | -5.329984 | 1.372352  |
| H  | 4.826821  | -2.284300 | 0.886911  |
| H  | 3.553182  | -2.949305 | 2.375000  |
| H  | 2.012534  | -1.162781 | 2.465897  |
| H  | 3.371839  | -0.170813 | -0.095532 |
| H  | 3.694231  | 0.386913  | 1.559252  |
| N  | -0.649025 | 0.813727  | -1.585794 |
| C  | 3.331074  | -2.532797 | 1.379656  |
| C  | 0.451224  | -3.700126 | -0.666194 |
| C  | 3.034027  | -4.858924 | 0.397205  |
| C  | 0.844887  | -4.153030 | -1.934319 |
| C  | -1.340677 | -5.132649 | -2.265736 |
| C  | -0.842660 | -3.969297 | -0.203794 |
| C  | -1.733917 | -4.685961 | -1.002828 |
| H  | -2.741183 | -4.888256 | -0.638614 |
| H  | -1.141608 | -3.618040 | 0.781803  |
| C  | -0.051338 | -4.862339 | -2.731617 |
| H  | 1.845667  | -3.925228 | -2.301456 |
| H  | -2.042543 | -5.682502 | -2.893133 |
| H  | 0.252857  | -5.194044 | -3.724465 |
| Si | -1.809901 | 2.092145  | -1.619613 |
| C  | 1.554471  | 3.569694  | 1.285031  |
| C  | 2.150622  | 2.714074  | -0.909629 |
| H  | 1.561290  | 3.512276  | -1.395271 |
| H  | 2.034448  | 1.823292  | -1.551122 |
| C  | 3.601886  | 3.109098  | -0.864161 |
| C  | 4.076620  | 4.298156  | -1.242611 |
| H  | 4.826678  | 2.354358  | -0.461847 |
| H  | 3.411614  | 5.071332  | -1.635791 |
| H  | 5.137845  | 4.543394  | -1.181897 |
| Si | -0.220708 | -0.097180 | -2.985539 |
| H  | 0.951976  | 4.379973  | 0.831832  |
| H  | 1.092728  | 3.315729  | 2.245944  |
| H  | 2.557490  | 3.986399  | 1.489125  |

**2•P**  
 $E = -2537.608487 \text{ a.u.}$   
 $N_{\text{imag}} = 0$

|    |           |           |           |
|----|-----------|-----------|-----------|
| Y  | 0.339404  | 0.584214  | 0.155089  |
| N  | -0.988550 | 0.453831  | 1.976096  |
| N  | 1.653255  | -1.412872 | -0.038068 |
| N  | 2.161129  | -3.510001 | -0.681158 |
| C  | 1.270260  | -2.667675 | -0.099224 |
| C  | 3.055809  | -1.342804 | -0.550958 |
| C  | 4.018661  | -0.983318 | 0.573736  |
| N  | 1.994350  | 2.021230  | 0.150162  |
| H  | 3.765265  | 0.003217  | 0.980379  |
| Si | -2.714568 | 0.372454  | 1.849957  |
| C  | -0.284665 | 2.404138  | 4.135344  |
| C  | -1.702809 | 0.257228  | 3.162088  |
| C  | -0.623278 | -0.531711 | 4.857214  |
| C  | -0.984242 | 3.335444  | -0.271795 |
| C  | -3.197189 | 2.389754  | -2.188480 |
| C  | -0.586121 | 3.577094  | -3.224841 |
| C  | -2.172230 | -1.456155 | -3.023948 |
| C  | 0.841031  | -1.285187 | -3.346456 |
| C  | -0.938181 | 0.606999  | -4.864410 |
| C  | -3.157611 | -0.560170 | 0.275564  |
| C  | -3.544286 | 2.073160  | 1.783919  |
| C  | -3.577169 | -0.502945 | 3.291780  |
| H  | -2.835410 | -1.606883 | 0.336335  |
| H  | -2.674740 | -0.114454 | -0.605366 |
| H  | -4.243822 | -0.553841 | 0.098684  |
| H  | -3.562439 | 0.106745  | 4.206394  |
| H  | -3.137066 | -1.478906 | 3.529246  |
| H  | -4.632805 | -0.665867 | 3.023922  |
| H  | -0.624091 | -1.580330 | 4.526190  |
| H  | -1.615185 | -0.311994 | 5.271378  |
| H  | 0.108298  | -0.444915 | 5.675779  |
| H  | -3.362182 | 2.599956  | 0.839252  |
| H  | -3.185399 | 2.718917  | 2.599177  |
| H  | -4.633983 | 1.964408  | 1.899160  |
| H  | -1.328592 | 2.615100  | 4.413179  |
| H  | 0.005818  | 3.145793  | 3.377069  |
| H  | 0.337992  | 2.564894  | 5.028356  |
| H  | 2.159853  | 0.758171  | 2.295372  |
| H  | 1.860958  | -0.824135 | 3.034649  |
| H  | 2.285357  | 0.569242  | 4.042344  |
| H  | -3.136592 | -0.927496 | -3.033156 |
| H  | -2.124320 | -2.020436 | -2.082678 |
| H  | -2.173712 | -2.175478 | -3.858027 |
| H  | 0.921006  | -2.036199 | -2.550295 |
| H  | 1.743064  | -0.655717 | -3.321332 |
| H  | 0.836496  | -1.822190 | -4.307216 |
| H  | -0.085023 | 1.259092  | -5.098159 |
| H  | -1.852009 | 1.215405  | -4.918322 |
| H  | -1.004903 | -0.157371 | -5.654088 |
| H  | -3.709684 | 1.826440  | -1.396978 |
| H  | -3.438301 | 1.906209  | -3.147004 |
| H  | -3.621602 | 3.405052  | -2.213311 |
| H  | -0.922377 | 3.329703  | -4.239865 |
| H  | 0.511895  | 3.526521  |           |
